# Supplementary material for: Integrative expression network analysis of microRNA and gene isoforms in sacred lotus
Source: PubMed Central journal article supplement (PMC7315500; doi:10.1186/s12864-020-06853-y), 2020-06-25

## Supplement figure

**Fig. S1** The distribution of reads along with mature miRNA length

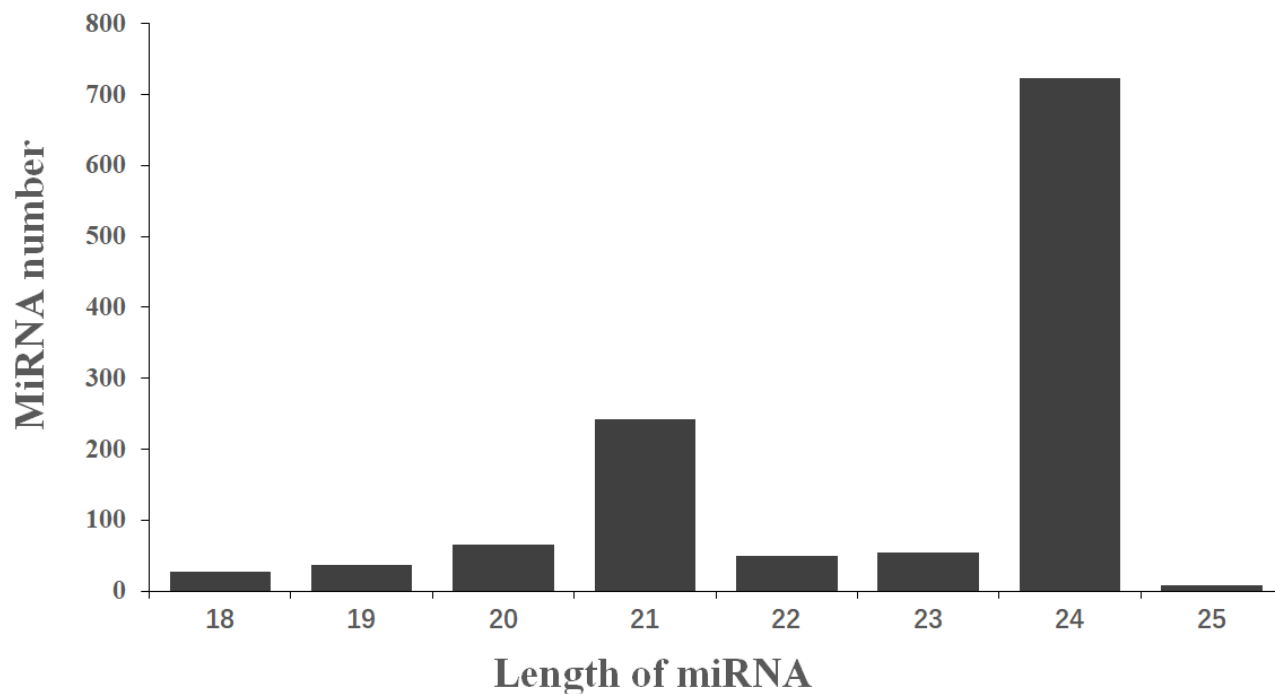

**Fig. S2** The presence of the miRNAs nucleotide bias at each position along with the mature miRNAs length

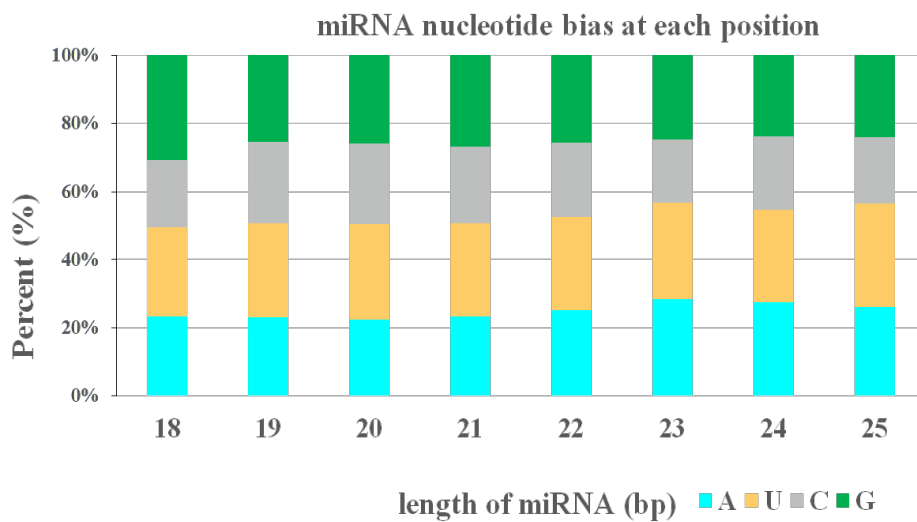

**Fig. S3** The presence of the first nucleotide of miRNAs along with the mature miRNA length.

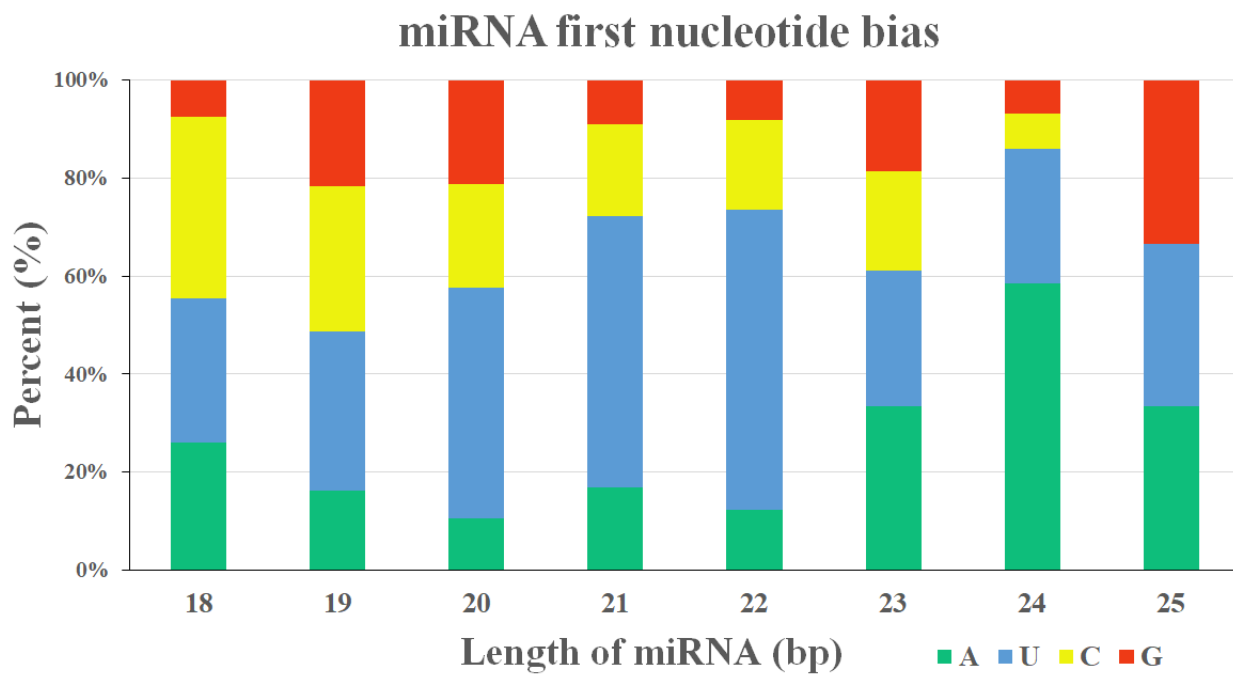

**Fig. S4** Pearson correlation coefficients among gene expression profiles generated by RNA-seq analysis of biological replicates.

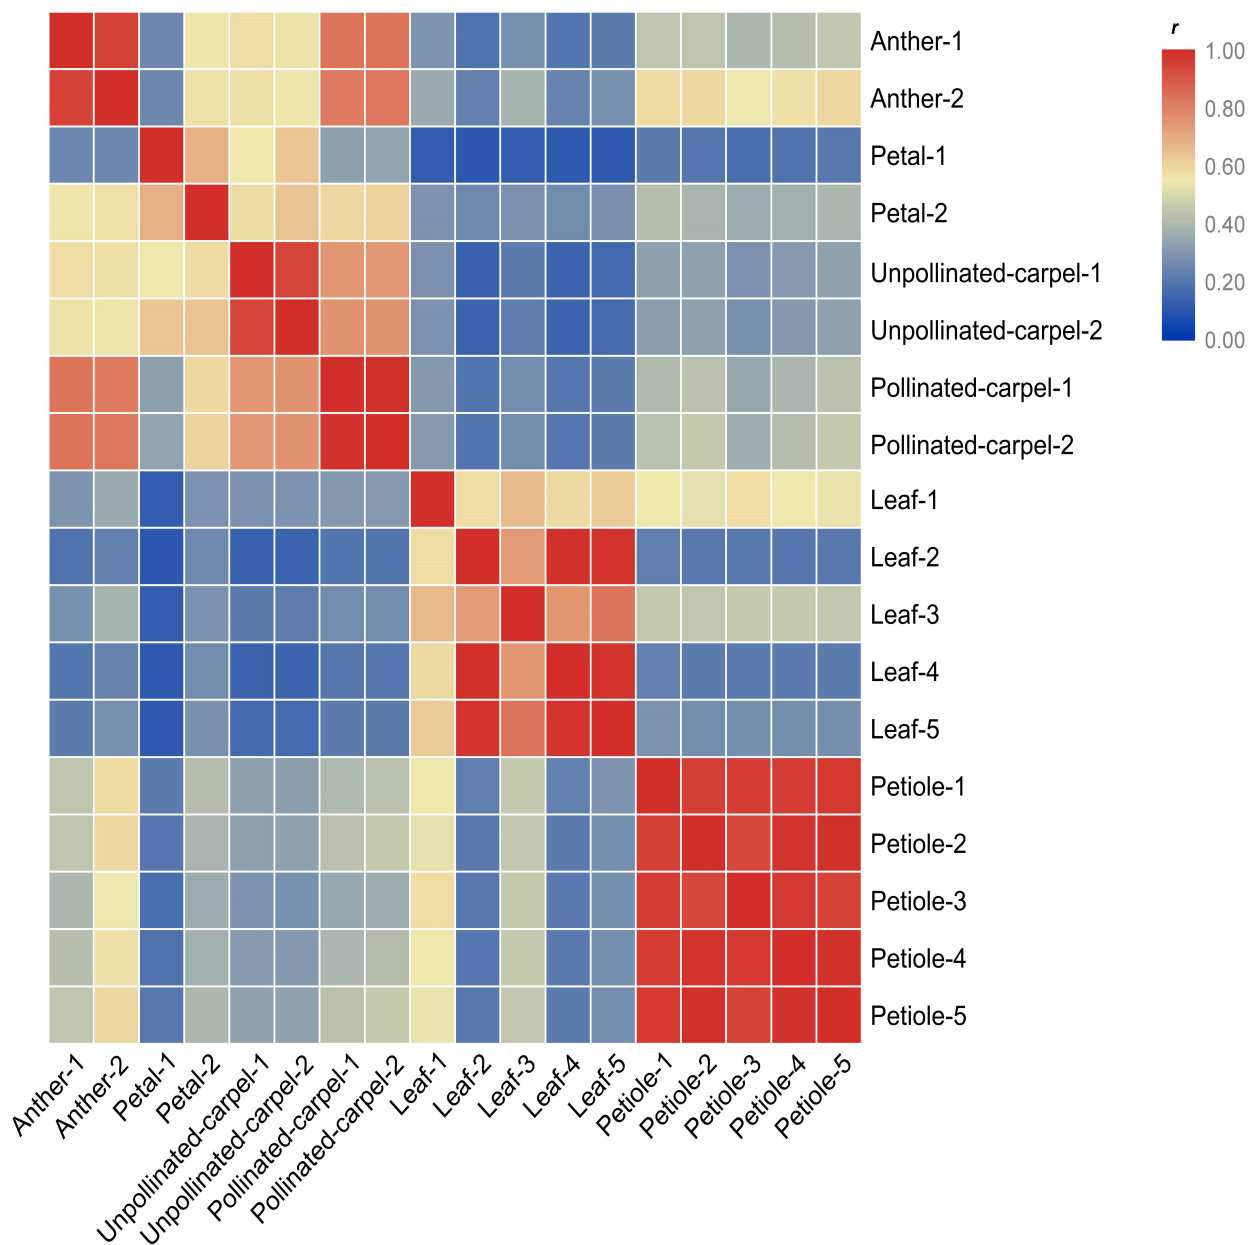

**Fig. S5** Expression profile of selected miRNAs and targeted genes. The expression of miRNAs are showed in line graphs. The expression of targeted genes are showed in the bar graph. The correlation coefficient between miRNA and targeted gene is showed. Gray : RT-PCR result; red: RNA-seq result. (a-f) “*nnu-miR394*” and its corresponding targeted gene. (e-h) “*miR159-3p*” and its corresponding targeted gene.

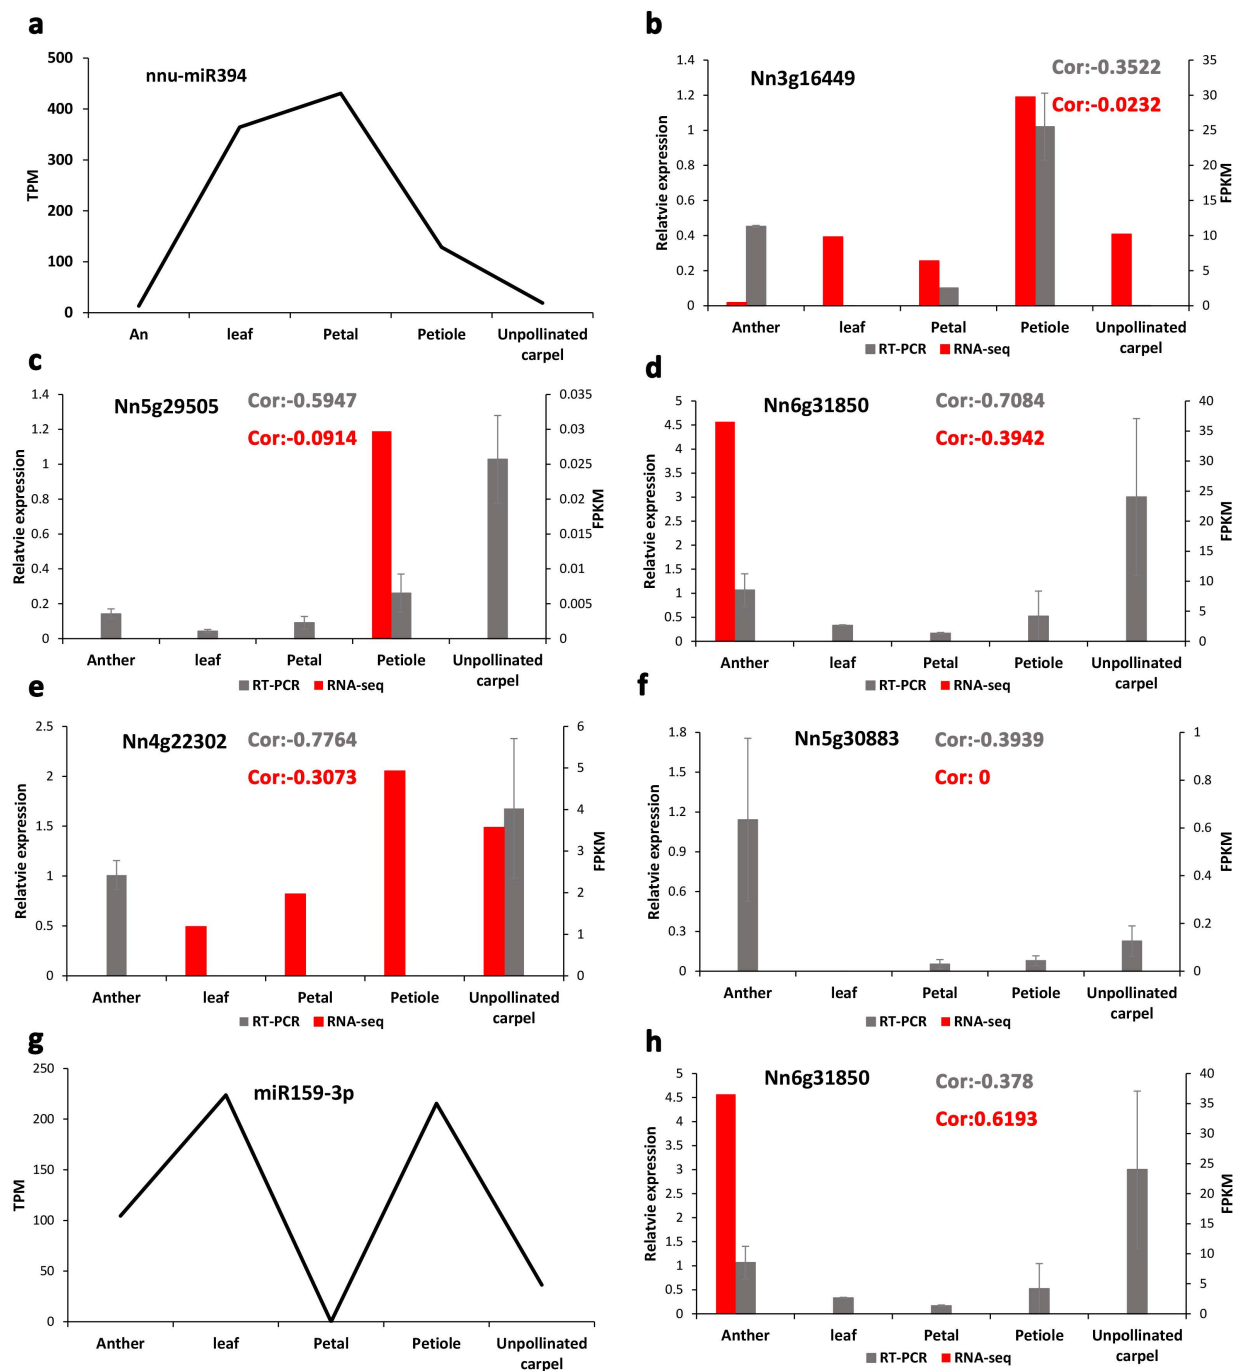

**Fig. S6** Characterization of identified miRNAs target loci of lotus. a) The distribution of miRNAs target loci in genes. b) The distribution of miRNAs target loci in isoforms

a

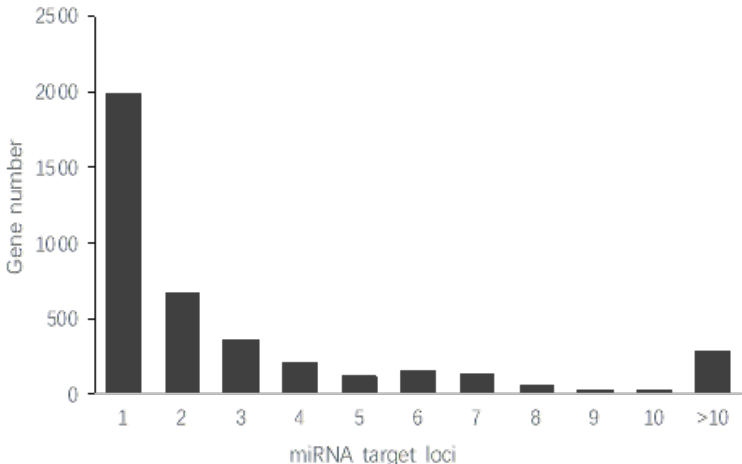

b

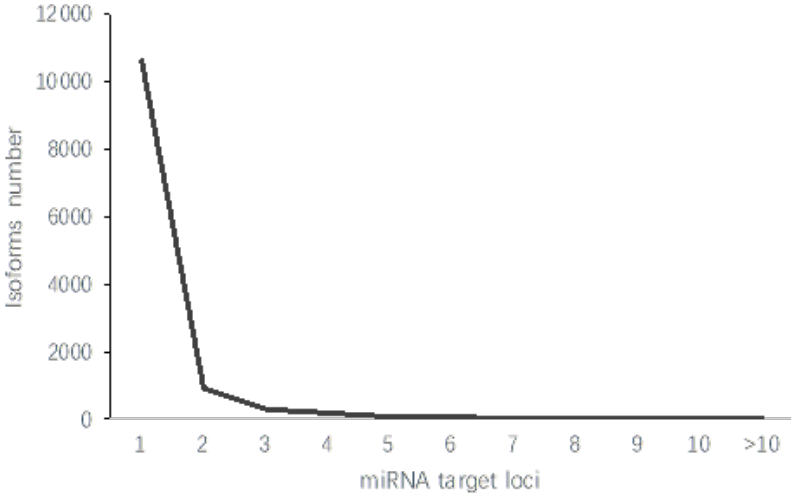

**Fig. S 7** The target analysis of miRNA and isoforms. The upper part show that the blue box-line is the construct of isoforms and the down part was the target loci of gene's different isoforms.

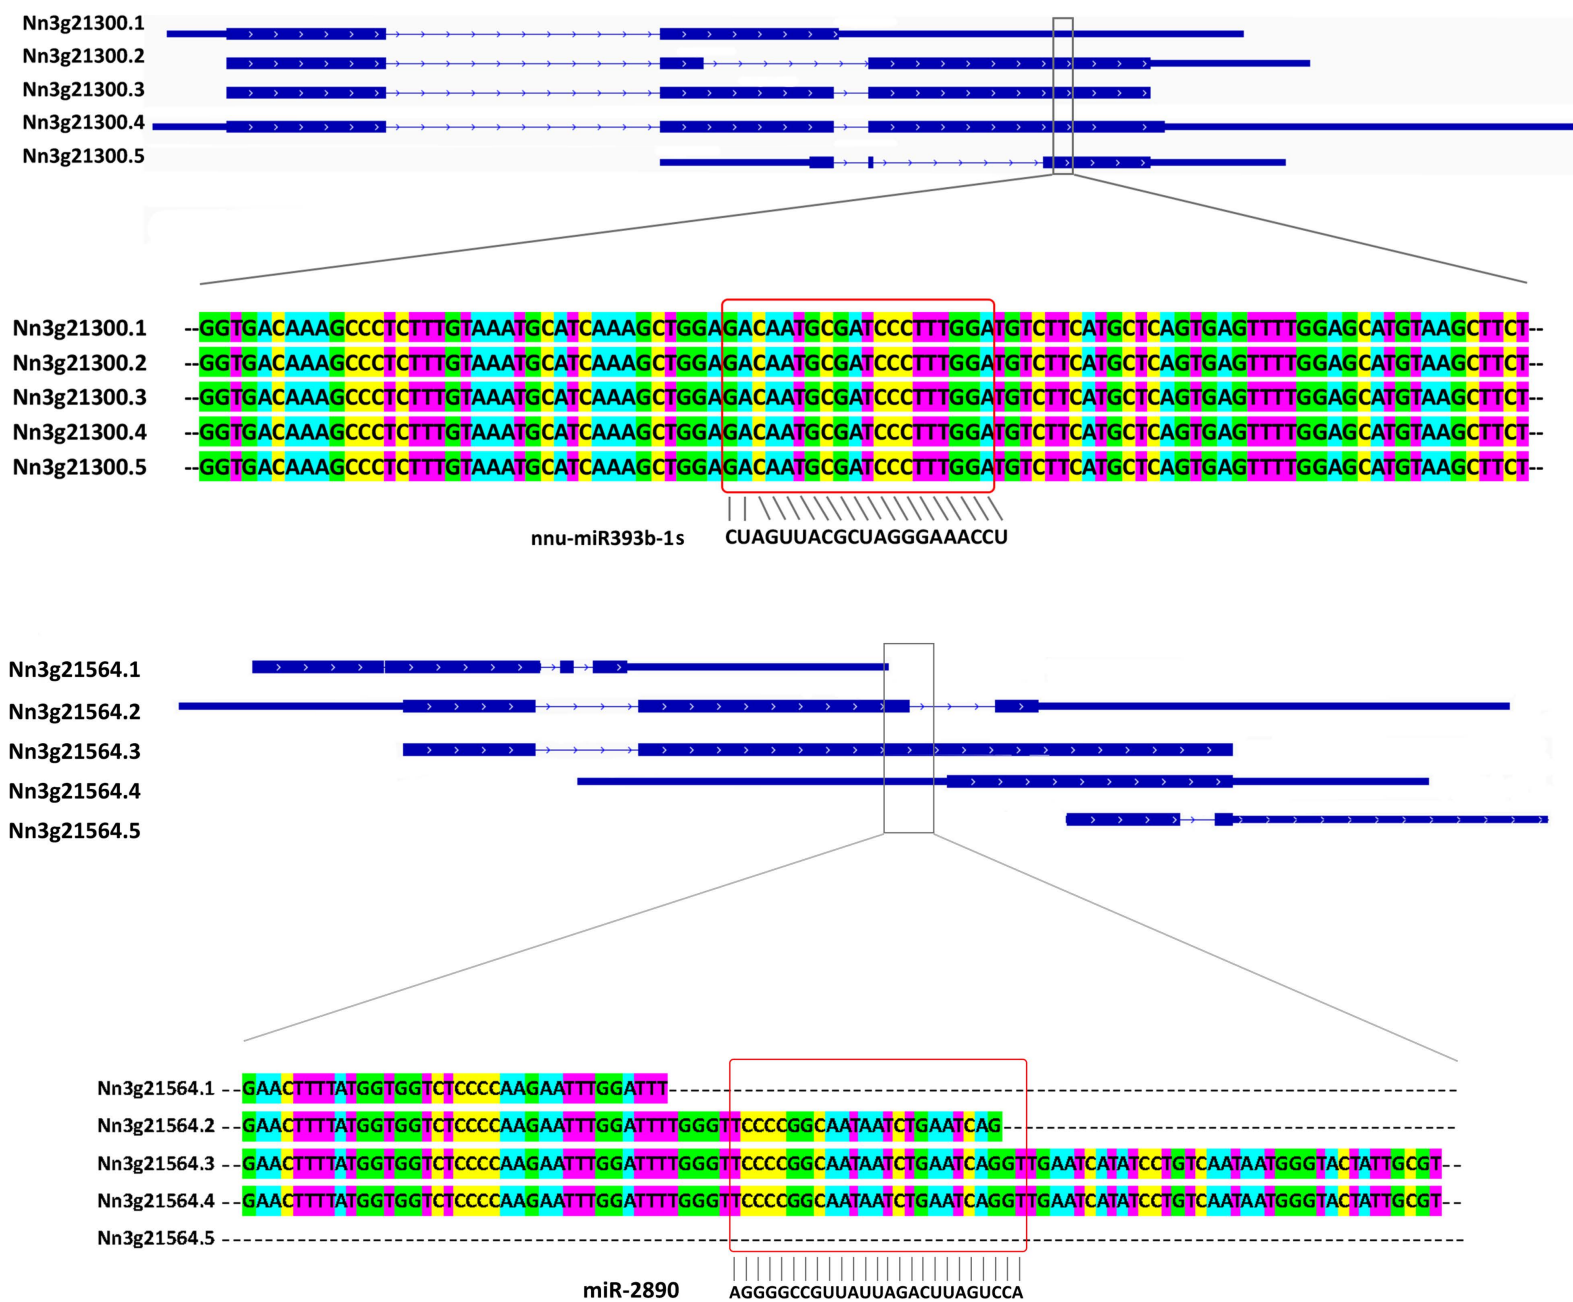

**Fig. S8** The expression analysis of miRNA targeted isoforms and non-miRNA targeted isoforms from same genes in lotus six samples.

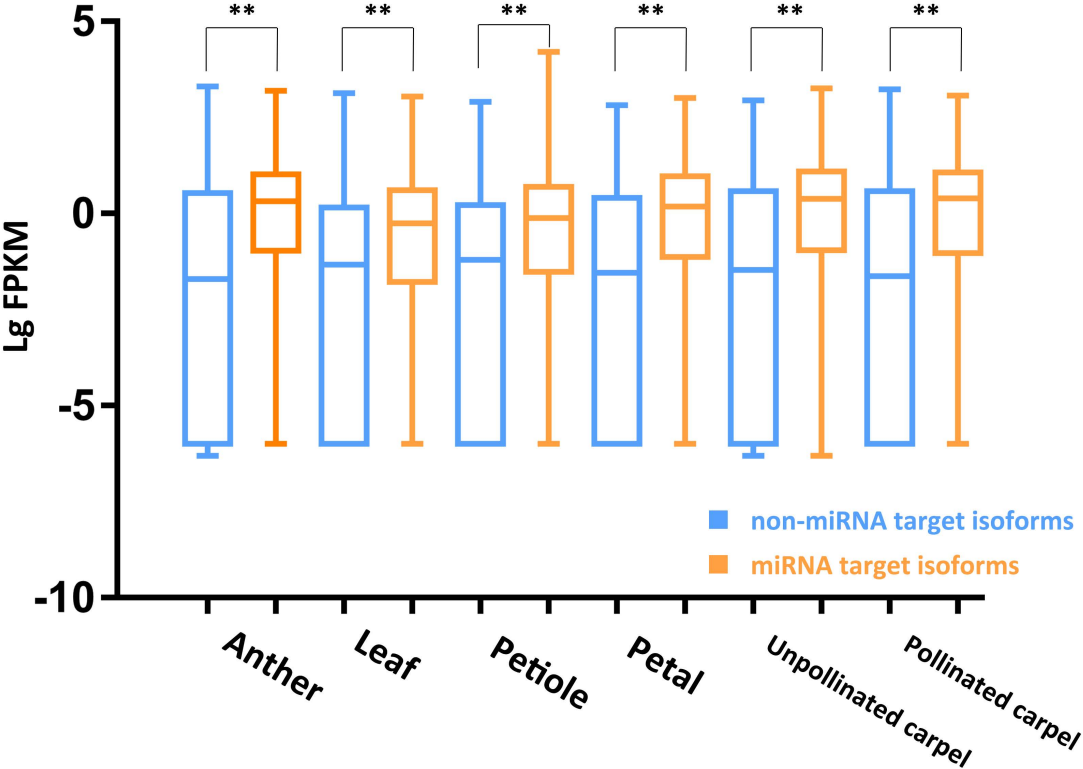

**Fig. S9** The GO and its enrichment analysis of all miRNAs target genes

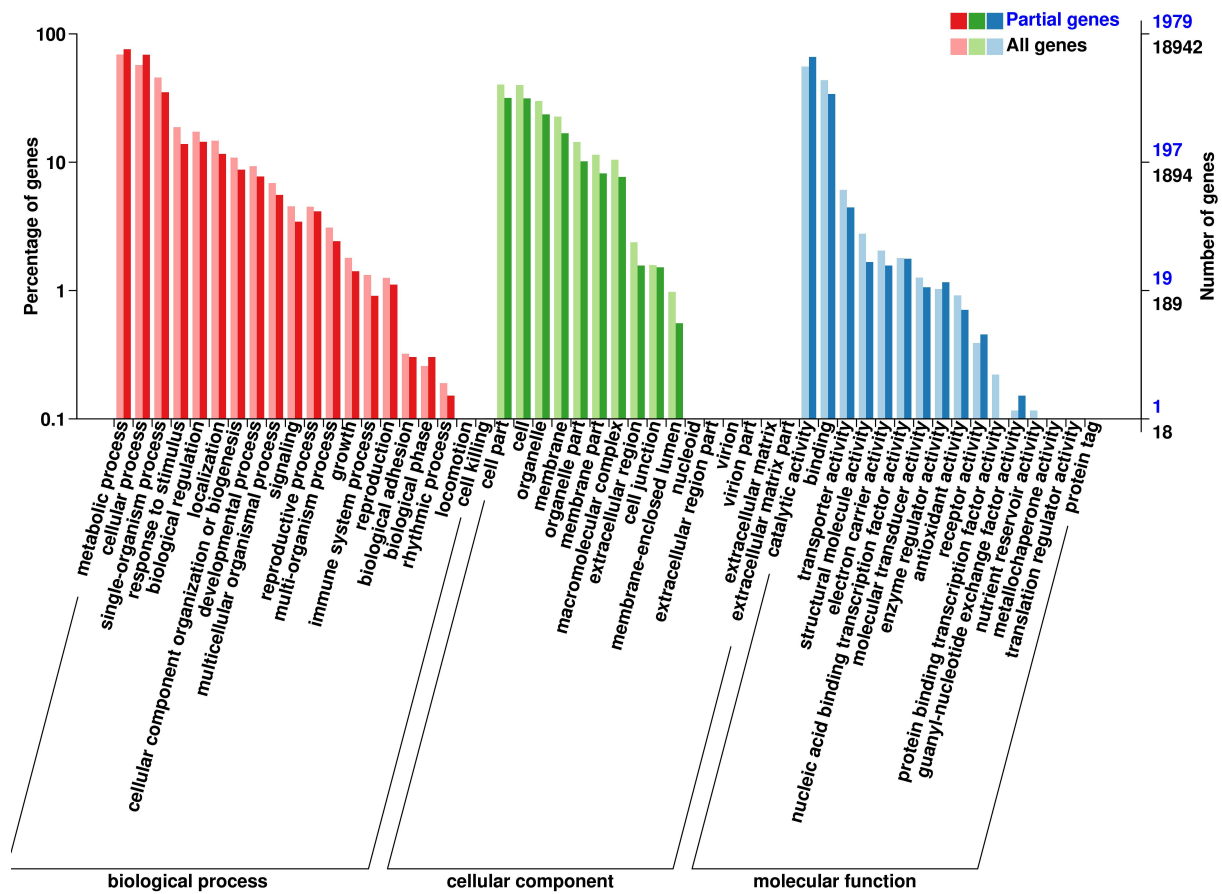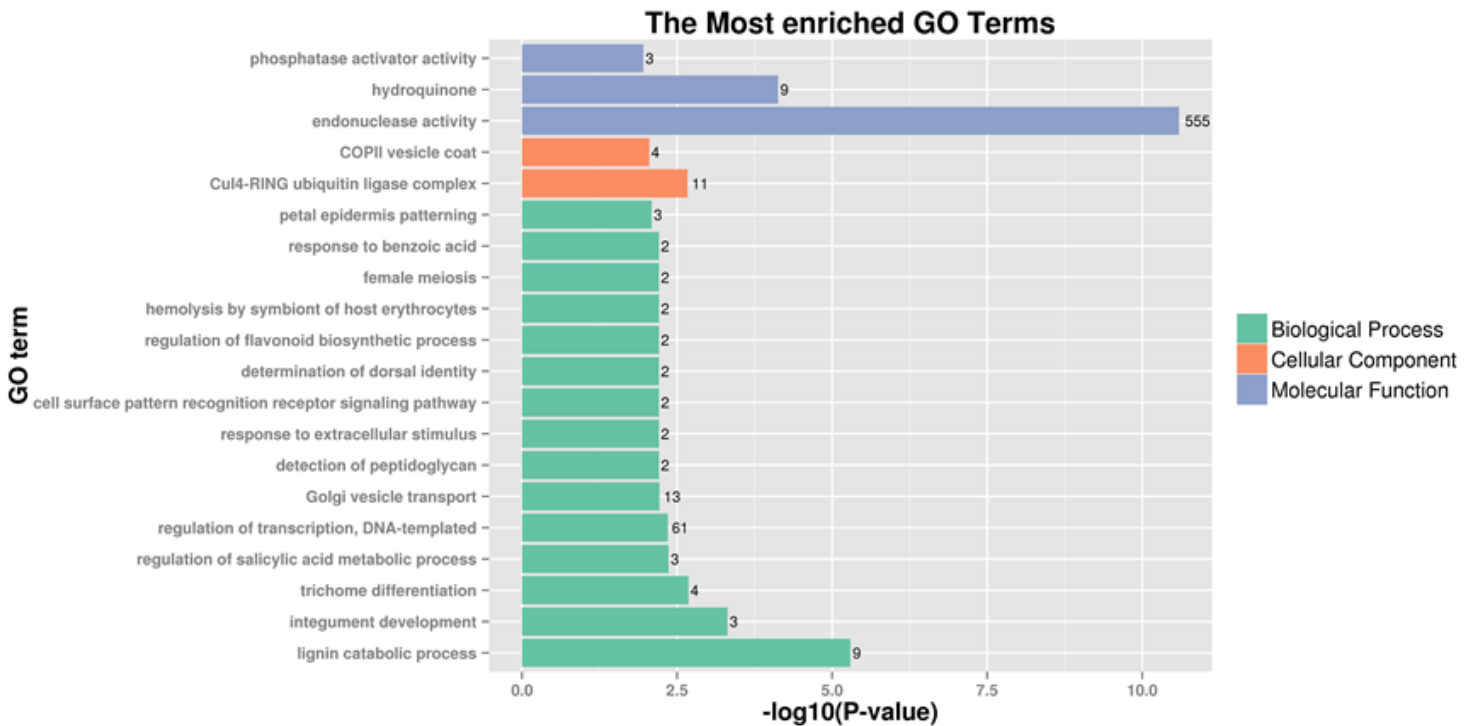



**Fig. S10** The GO enrichment analysis in 6 samples. a) anther; b) leaf; c) petal; d) petiole; e) unpollinated carpel ; f) pollinated carpel.

## Anther

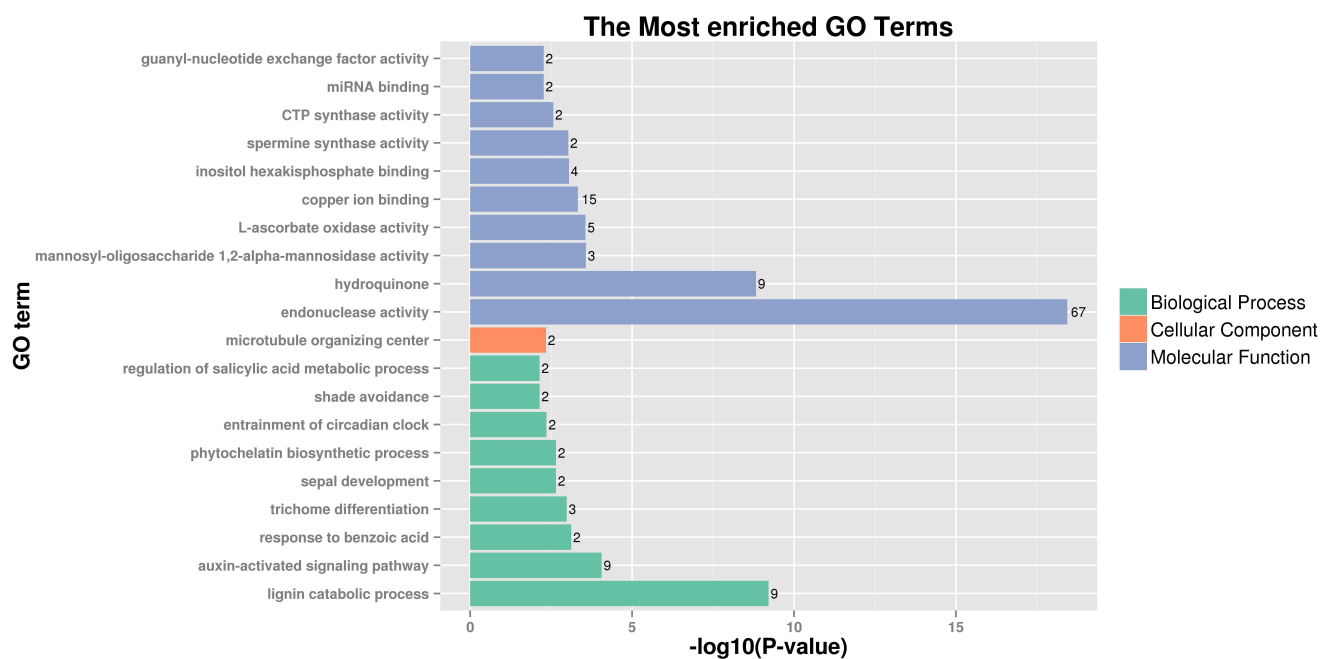

## Leaf

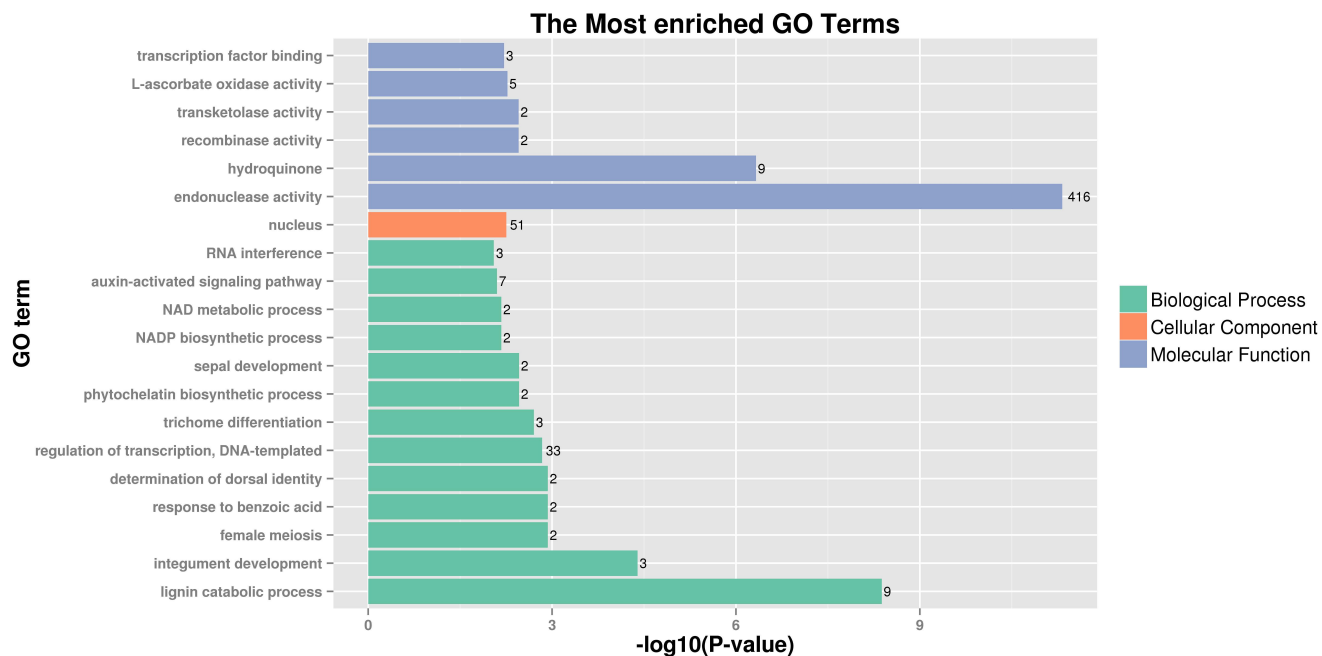

# Petal

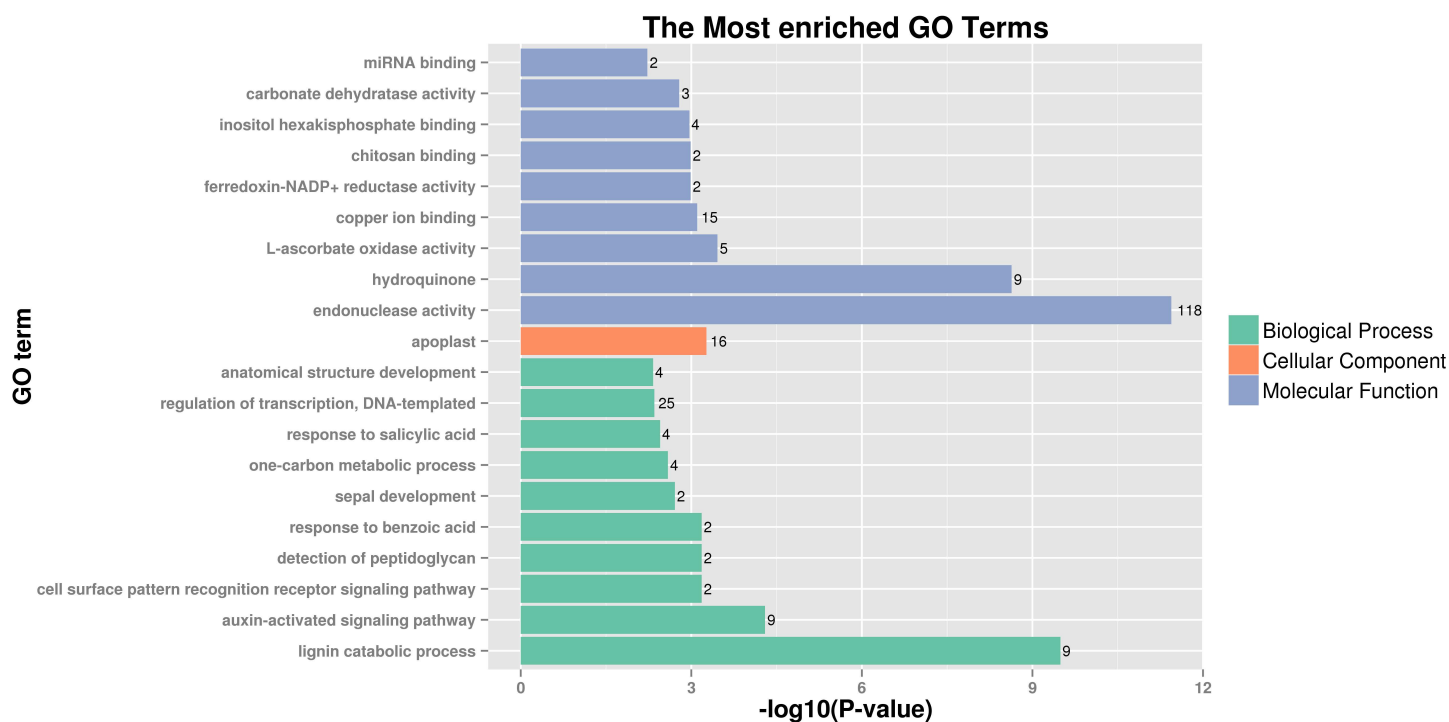

# Petiole

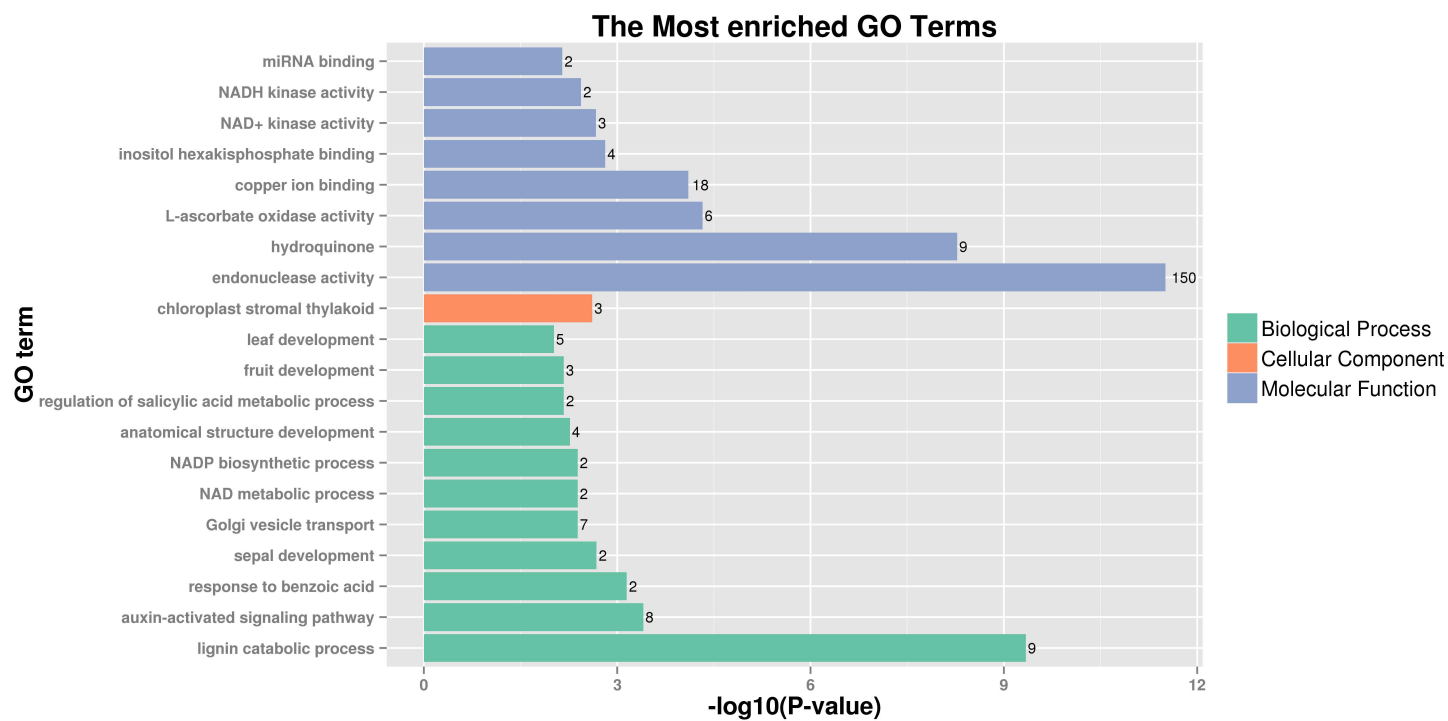

# Unpollinated carpel

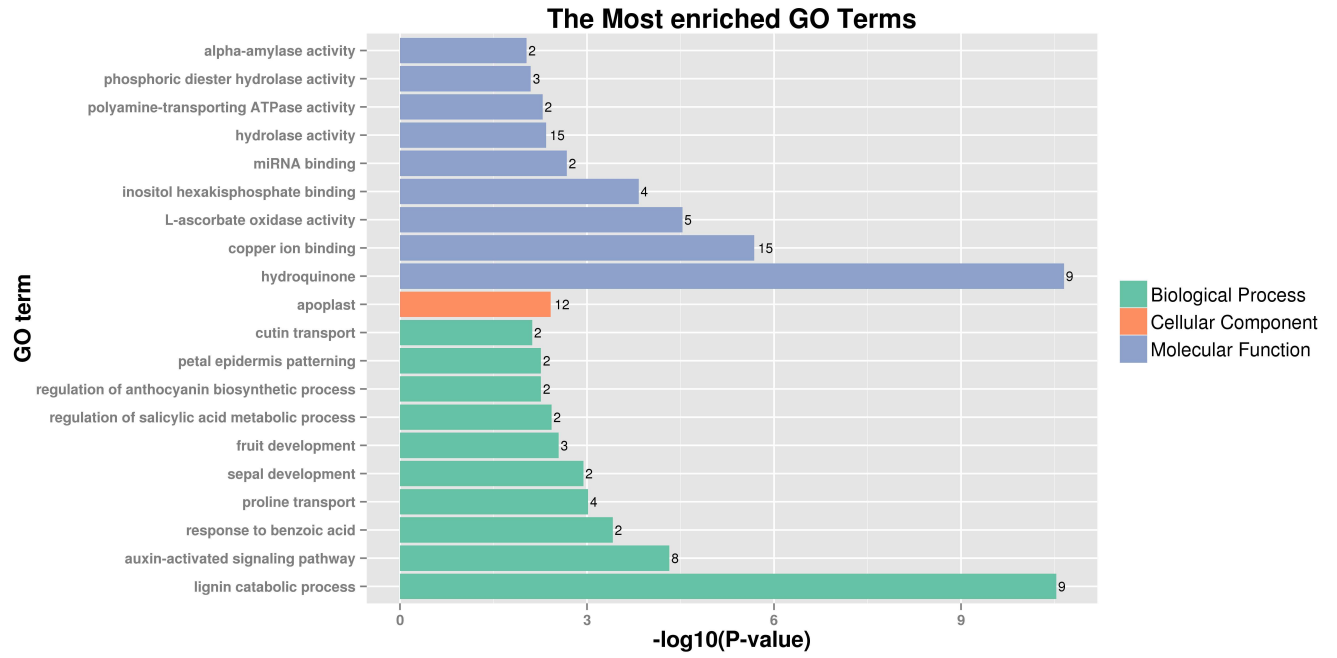

# Pollinated carpel

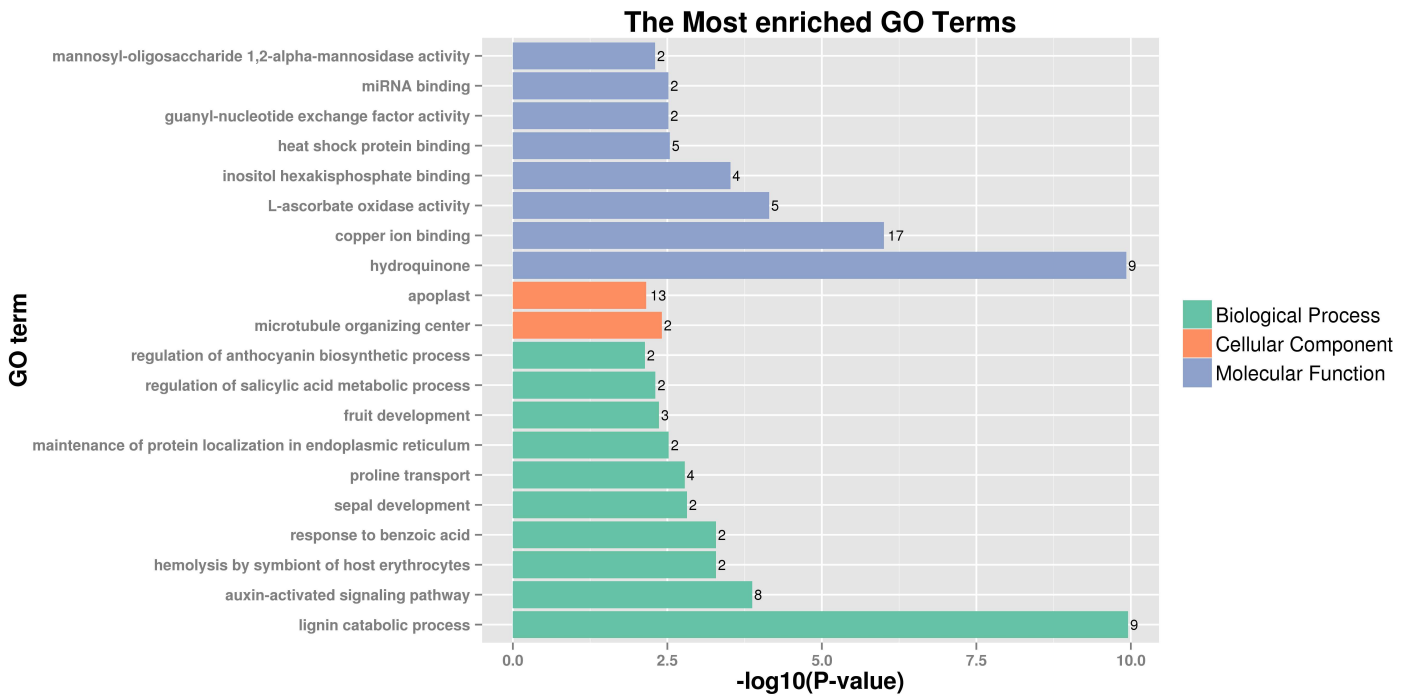

**Fig. S11** Heatmap of filtered isoforms in 6 samples. The expression level is displayed with different color based on  $\log_2$  (FPKM).

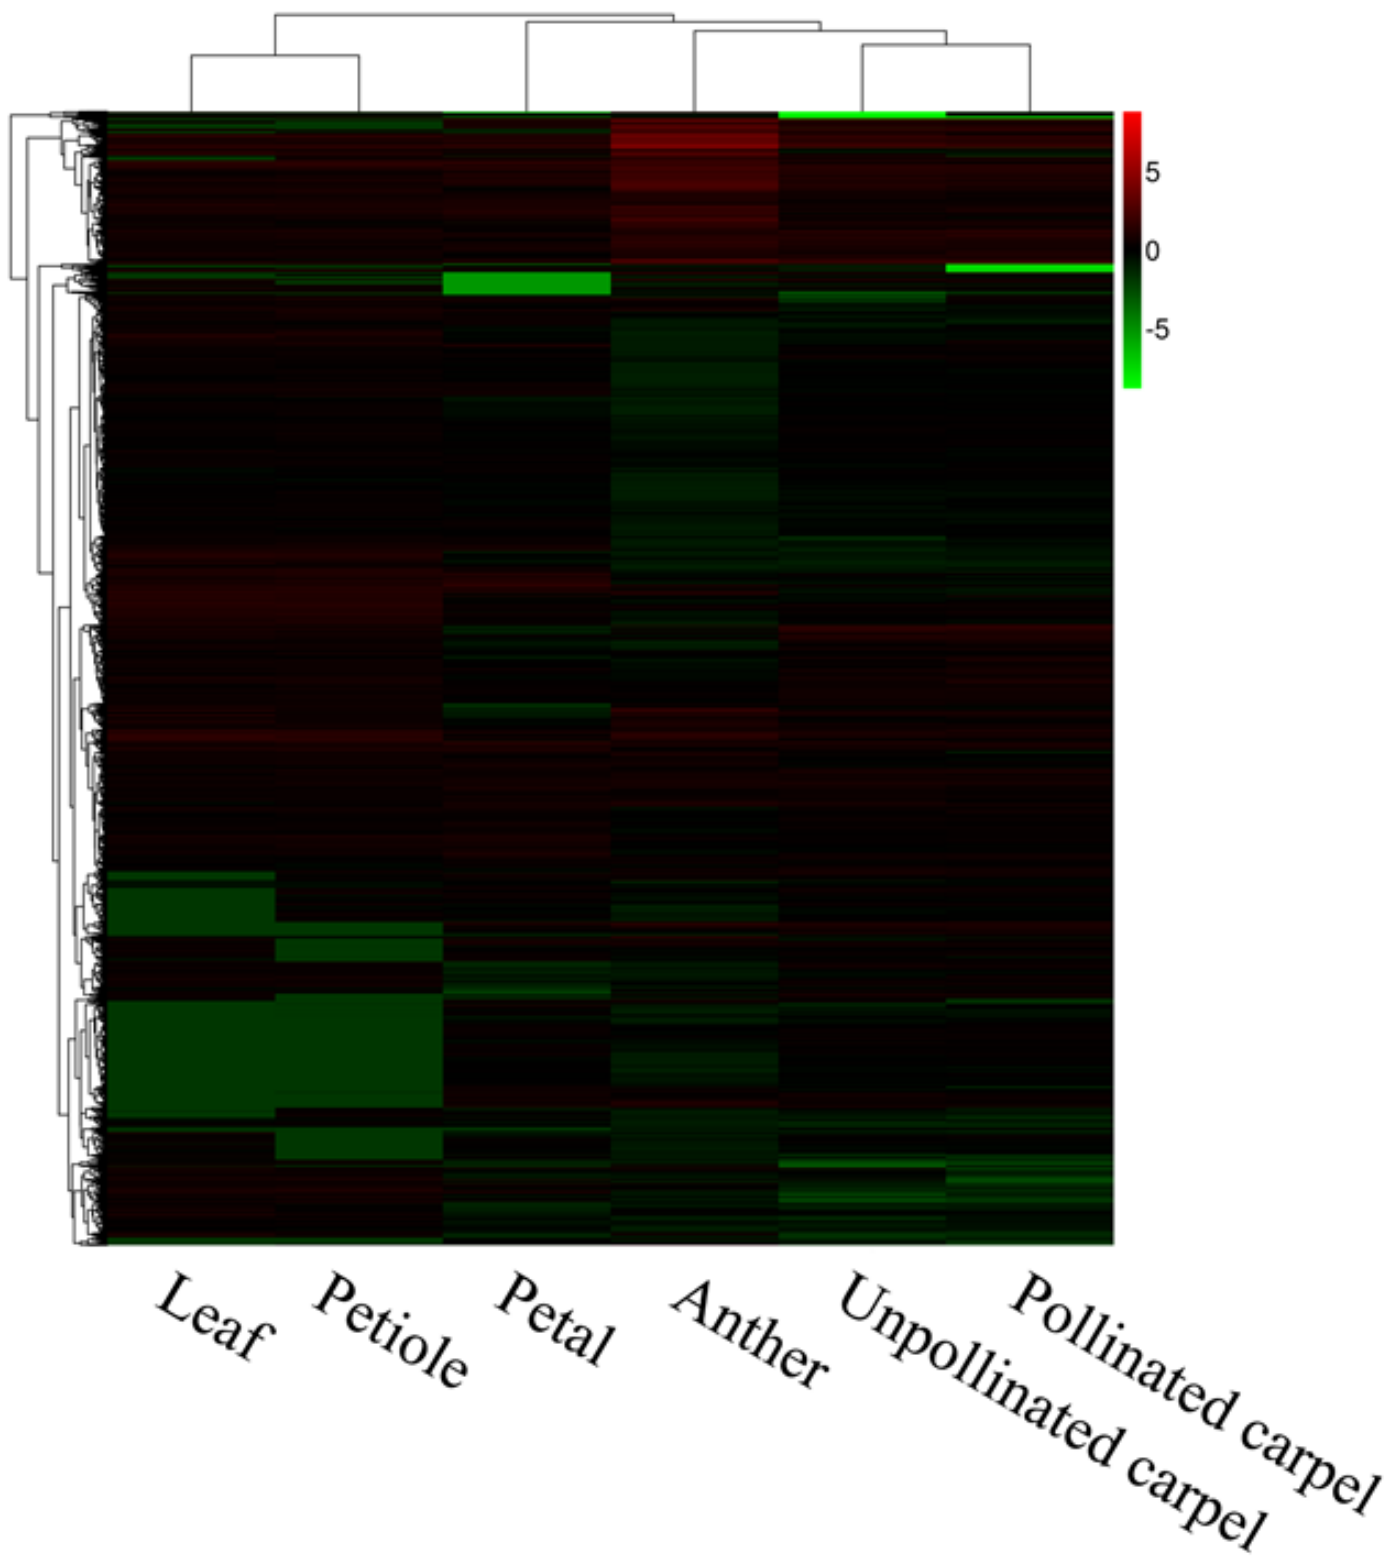

**Fig. S12** The correlation network of hub isoforms in each module.

**Black**

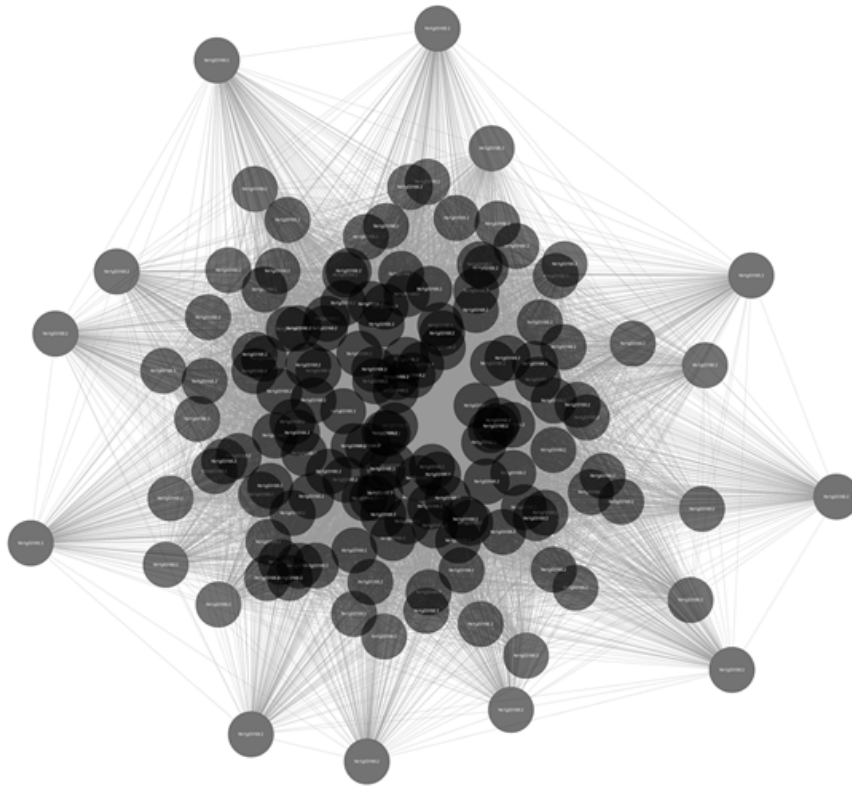

**Brown**

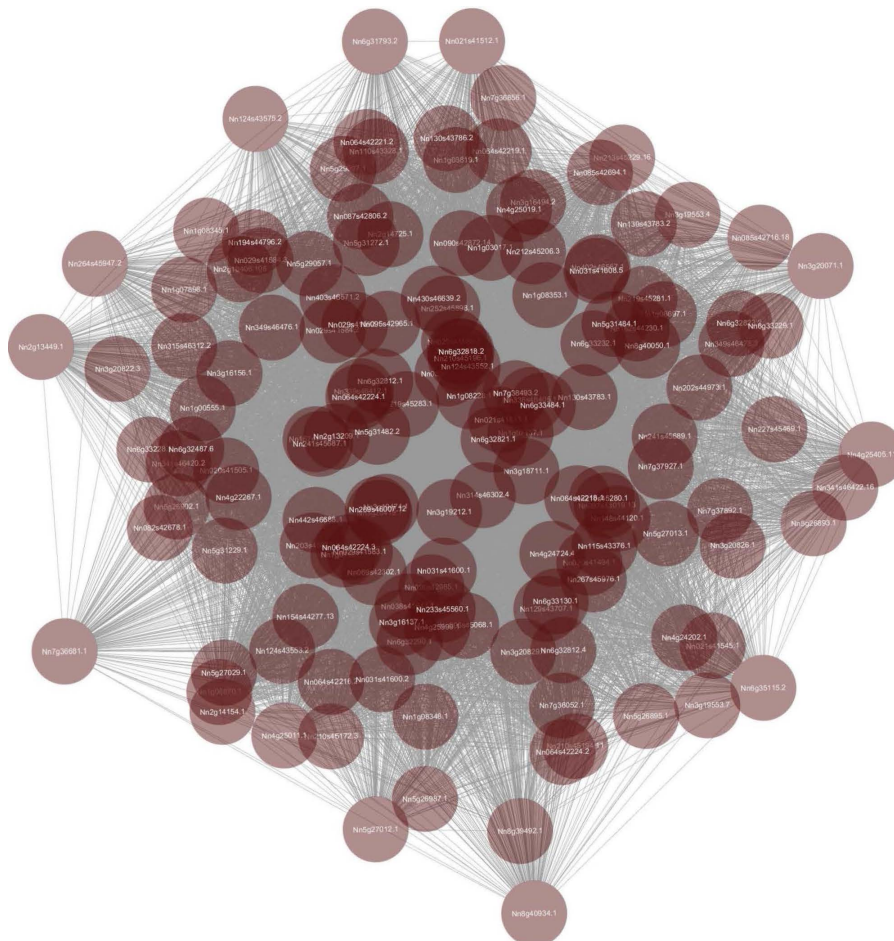

**cyan**

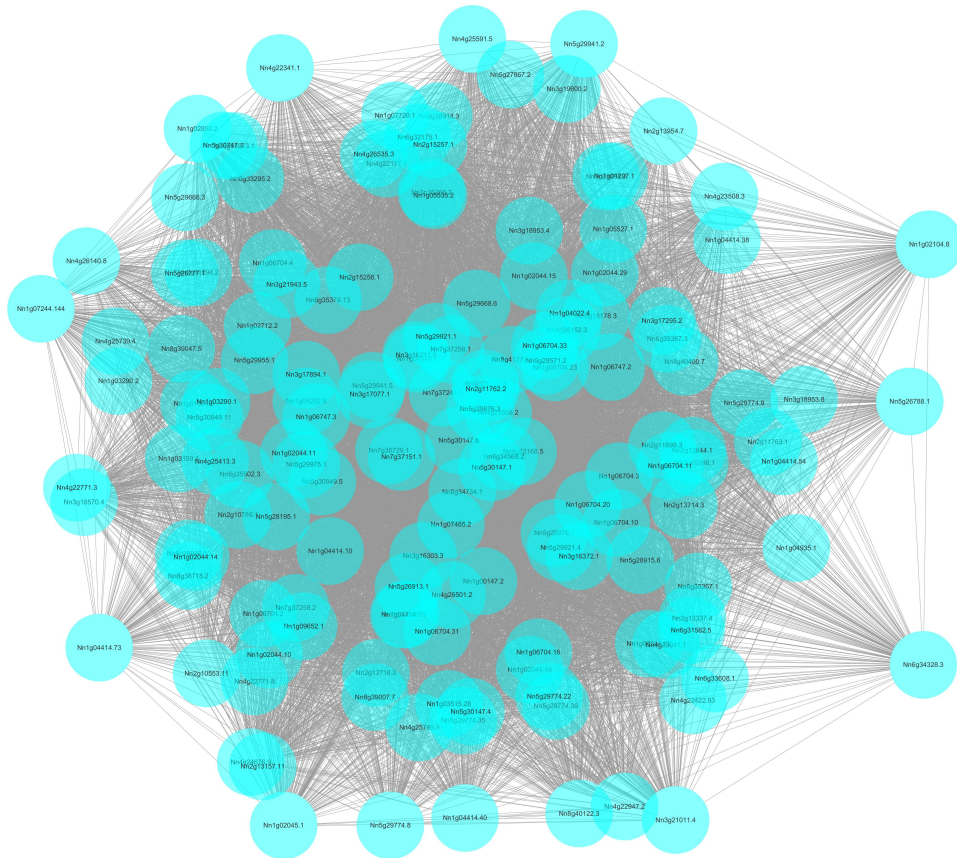

**green**

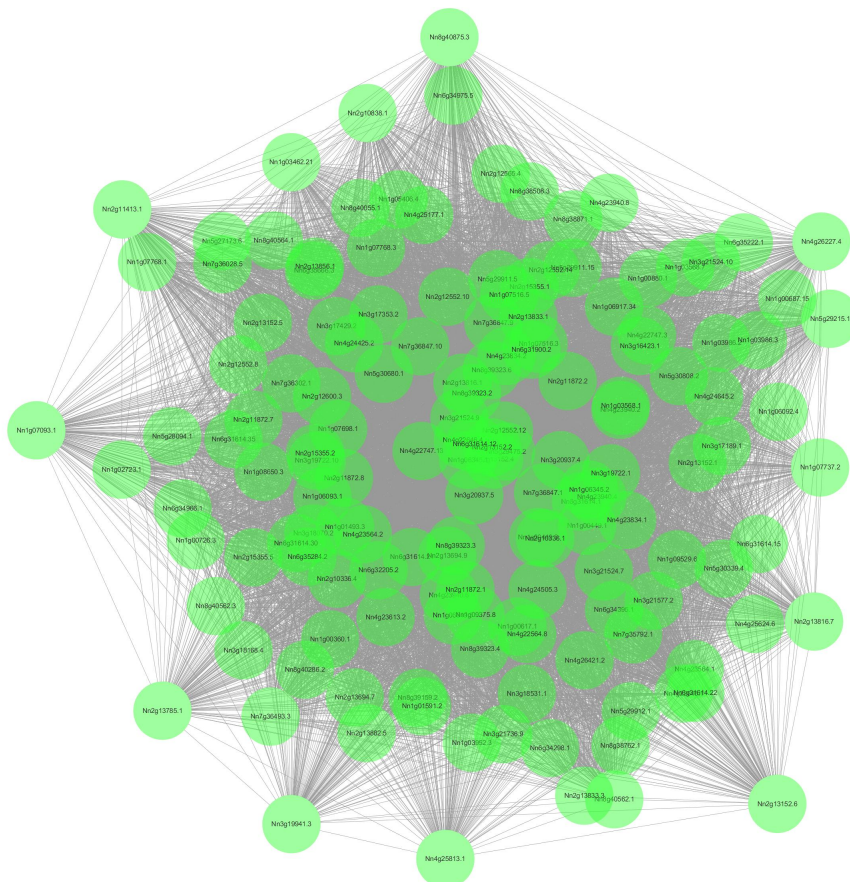

# greenyellow

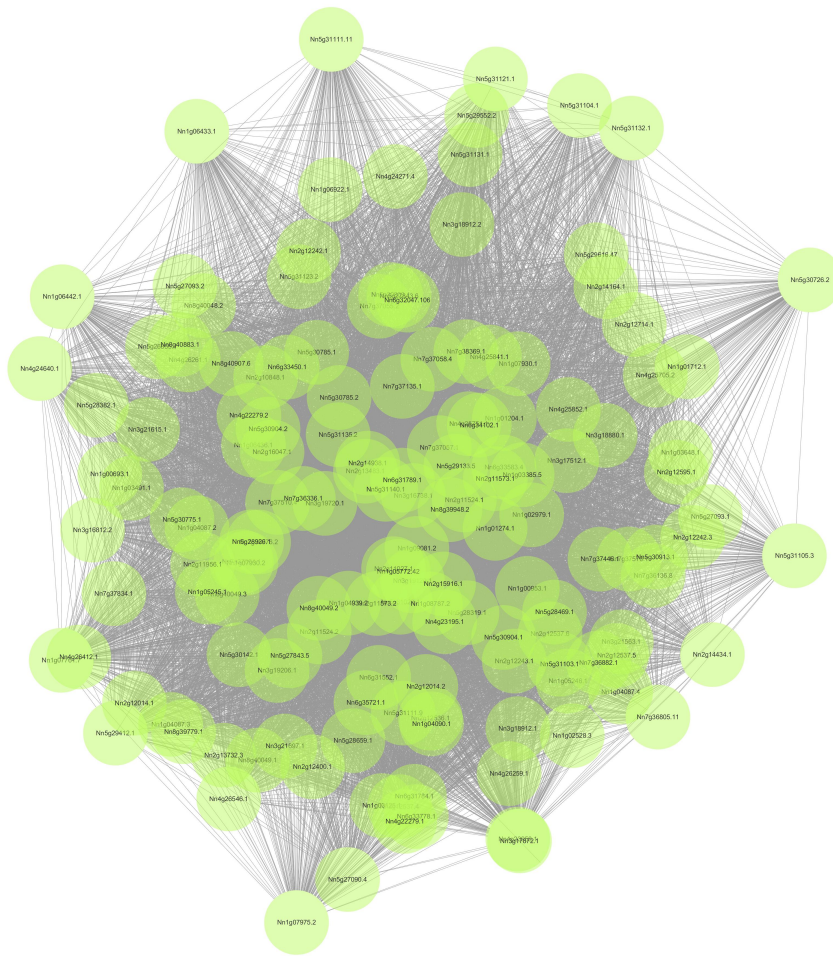

# megenta

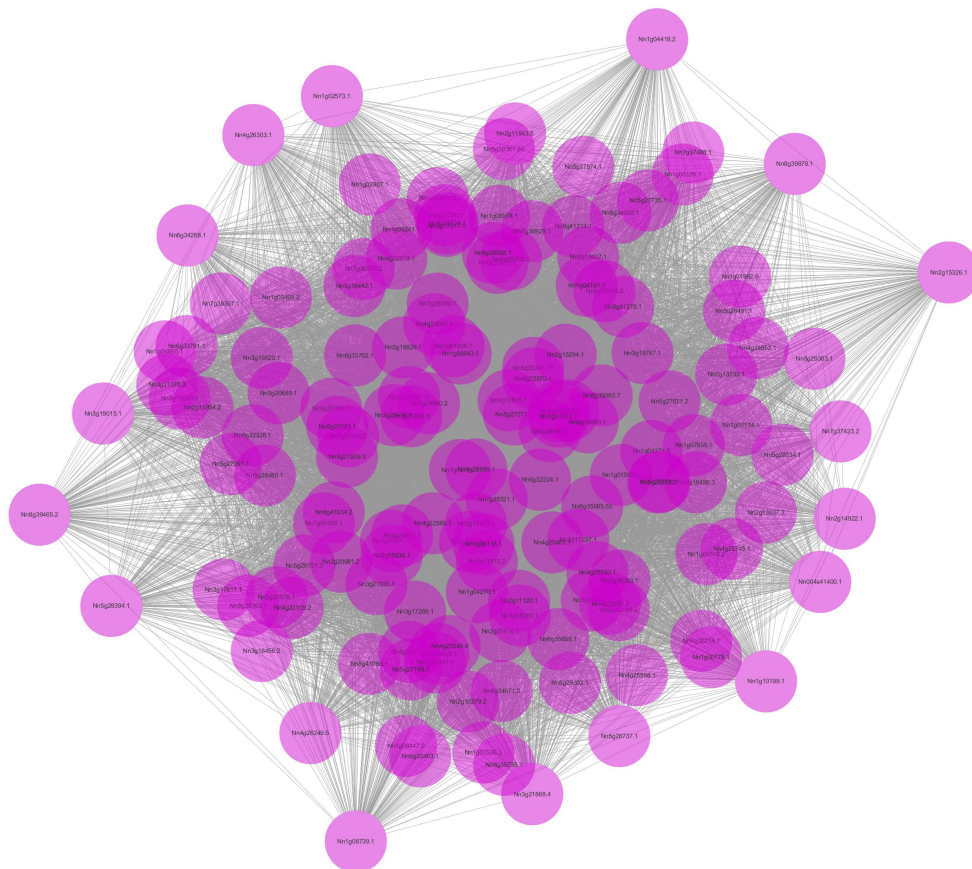

midnightblue

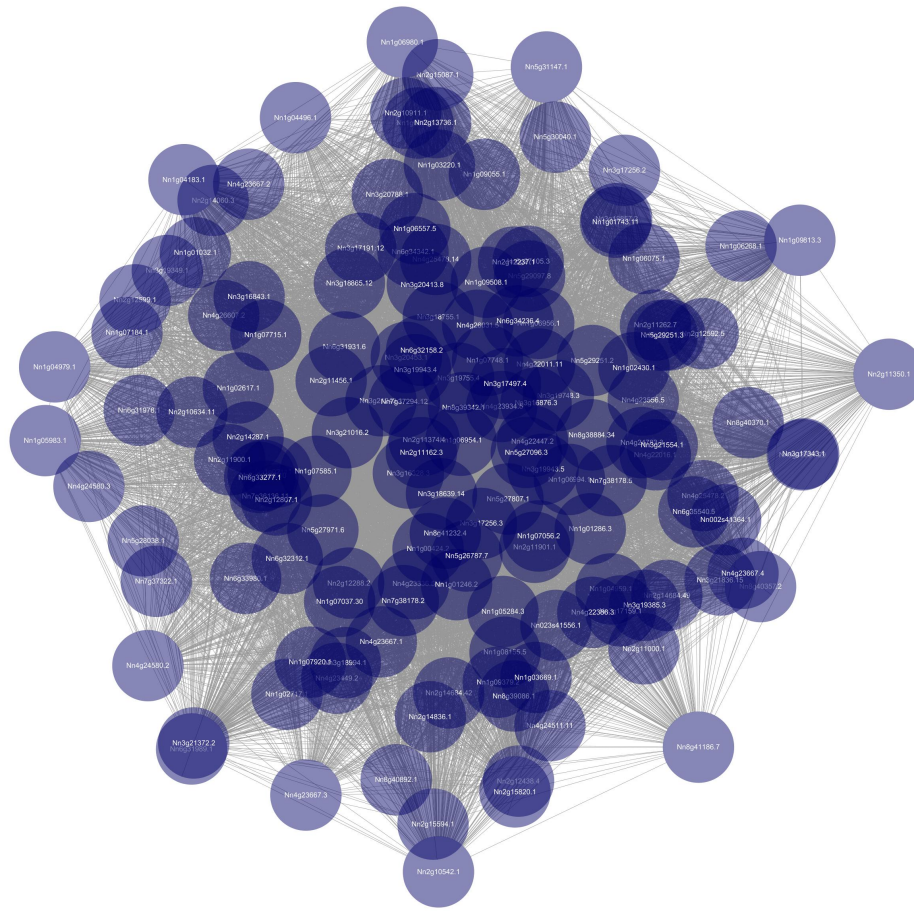

pink

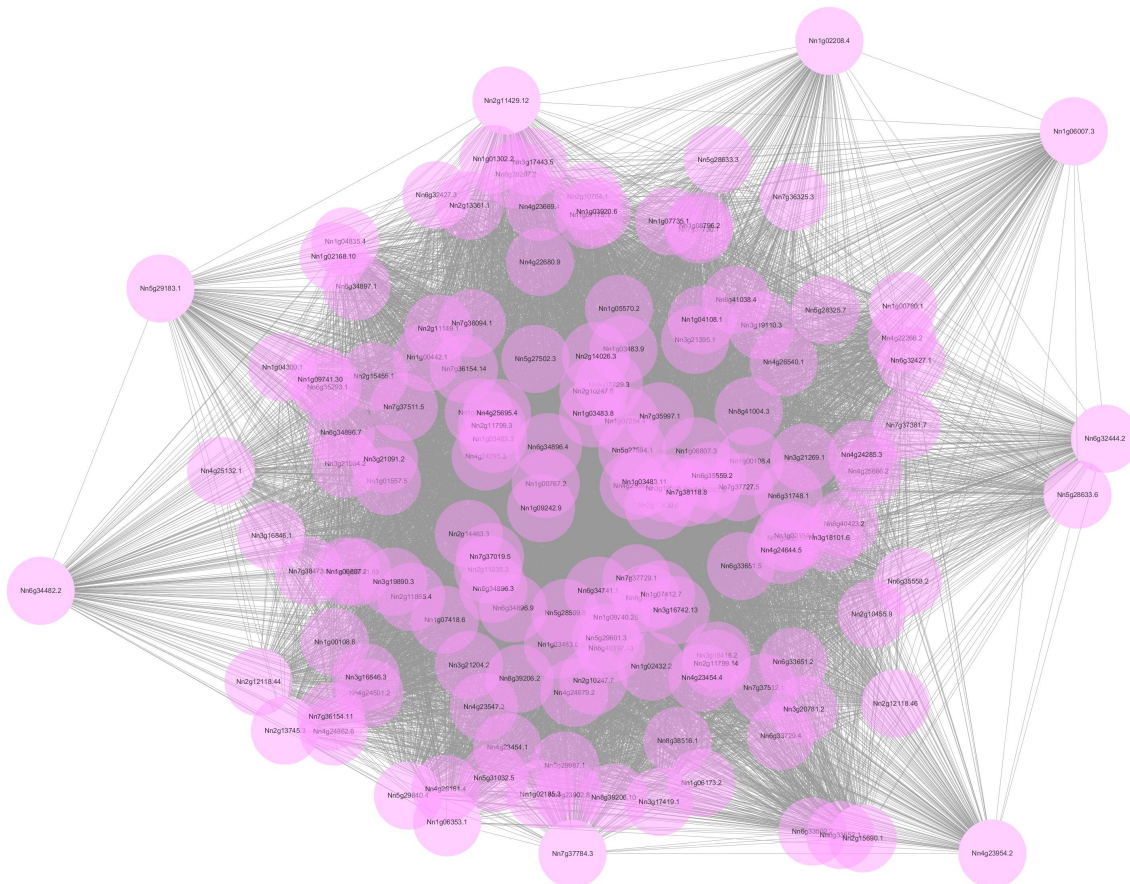



red

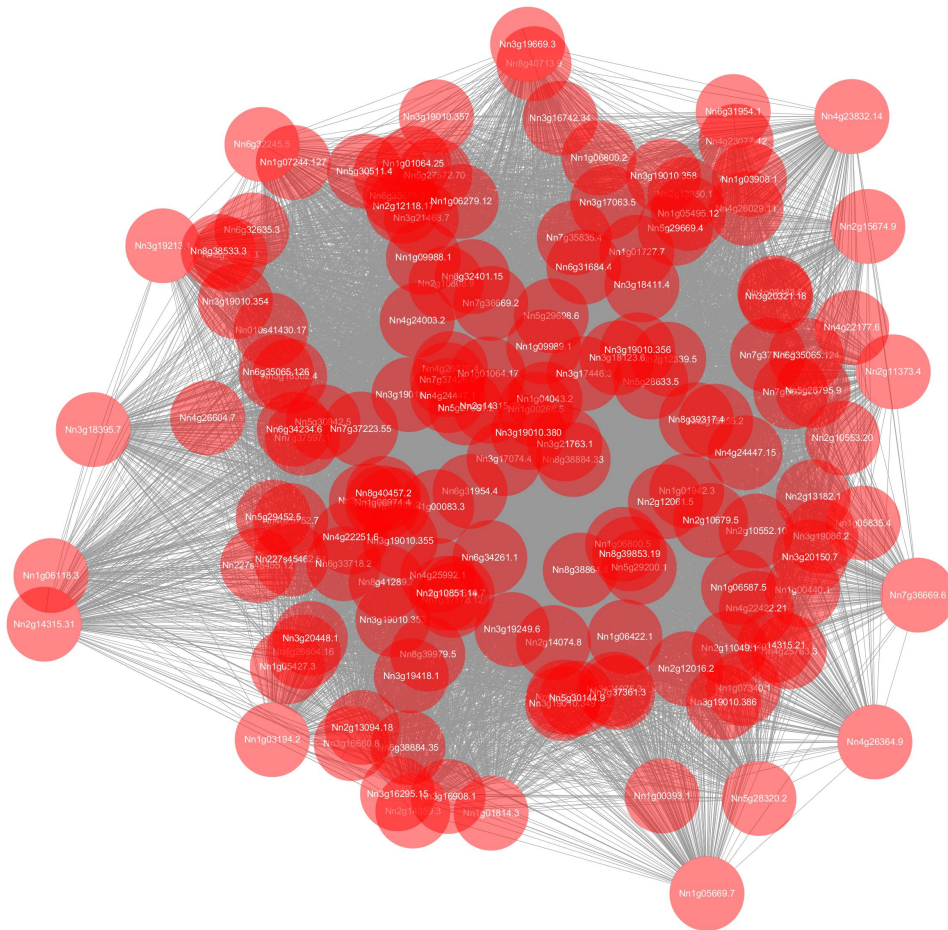

yellow

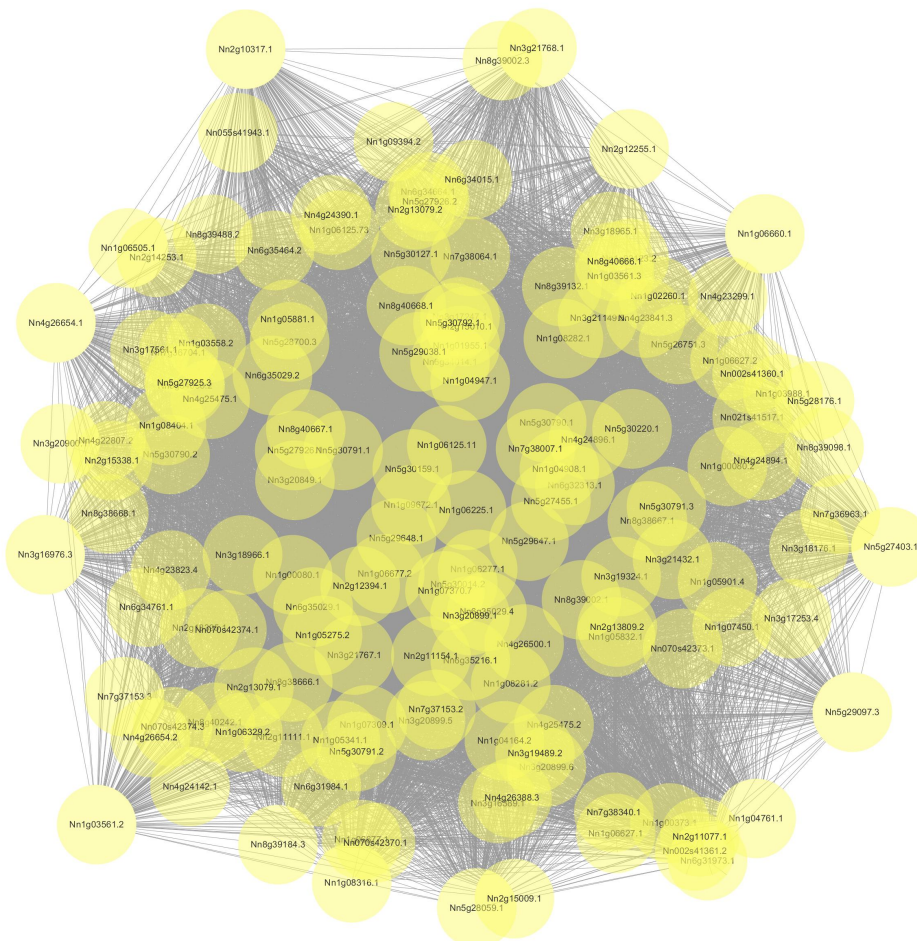

**Fig. S13** The correlation analysis between different modules.

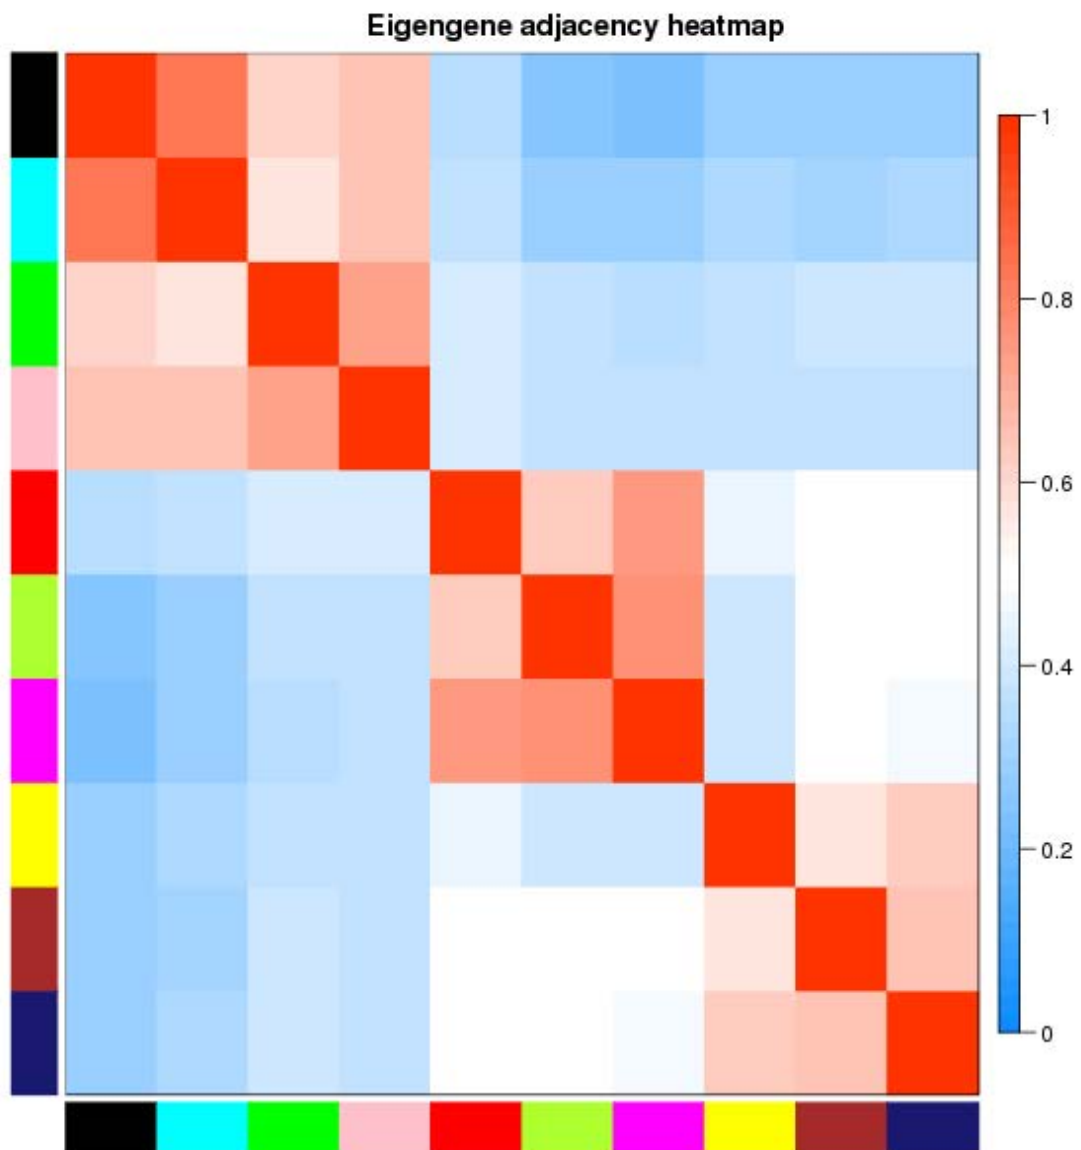

**Fig. S14** The percentage of miRNA target isoforms in all isoforms. a) the percentage of miRNA targeted isoforms in each module isoforms. b) the percentage of miRNA targeted isoforms in hub isoforms of each module. c) the  $\chi^2$  test analysis between the the proportion of isoforms in all modules being targeted by miRNAs and the corresponding proportion of isoforms in hubs

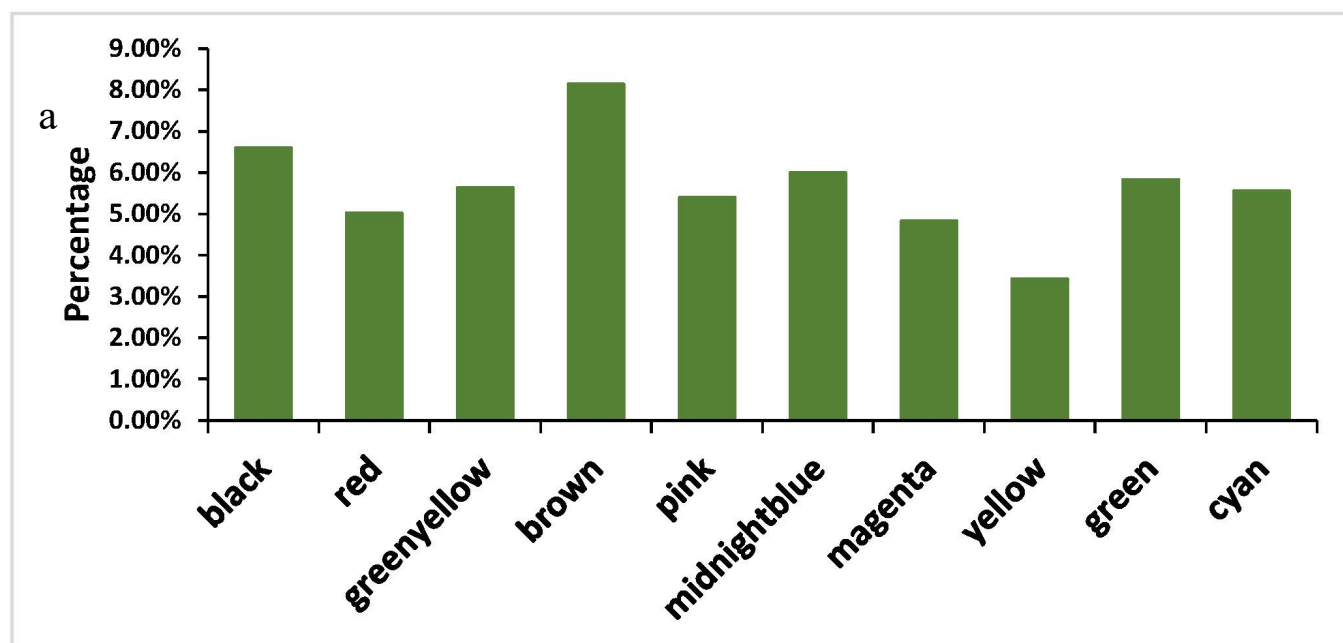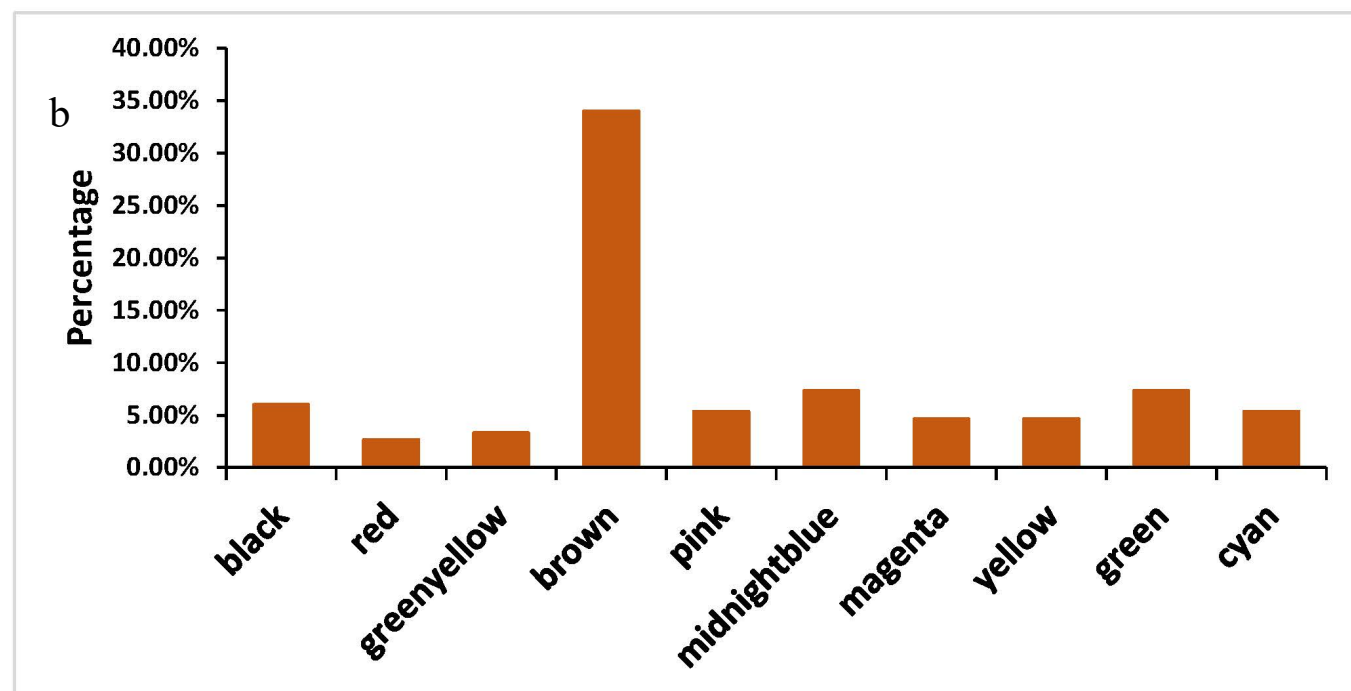

c

| module  | black | red   | greenyellow | brown    | pink  | midnightblue | magenta | yellow | green | cyan  |
|---------|-------|-------|-------------|----------|-------|--------------|---------|--------|-------|-------|
| p-value | 0.781 | 0.213 | 0.259       | 1.26E-17 | 0.975 | 0.565        | 0.932   | 0.450  | 0.481 | 0.912 |

**Fig. S15** The isoform module distribution of a IDDM gene “Nn5g29774”. The isoforms which are filtered out are transparent linked by imaginary line. The module isoforms are colored in the color of corresponding module. The isoforms targeted by miRNAs are linked by blue line.

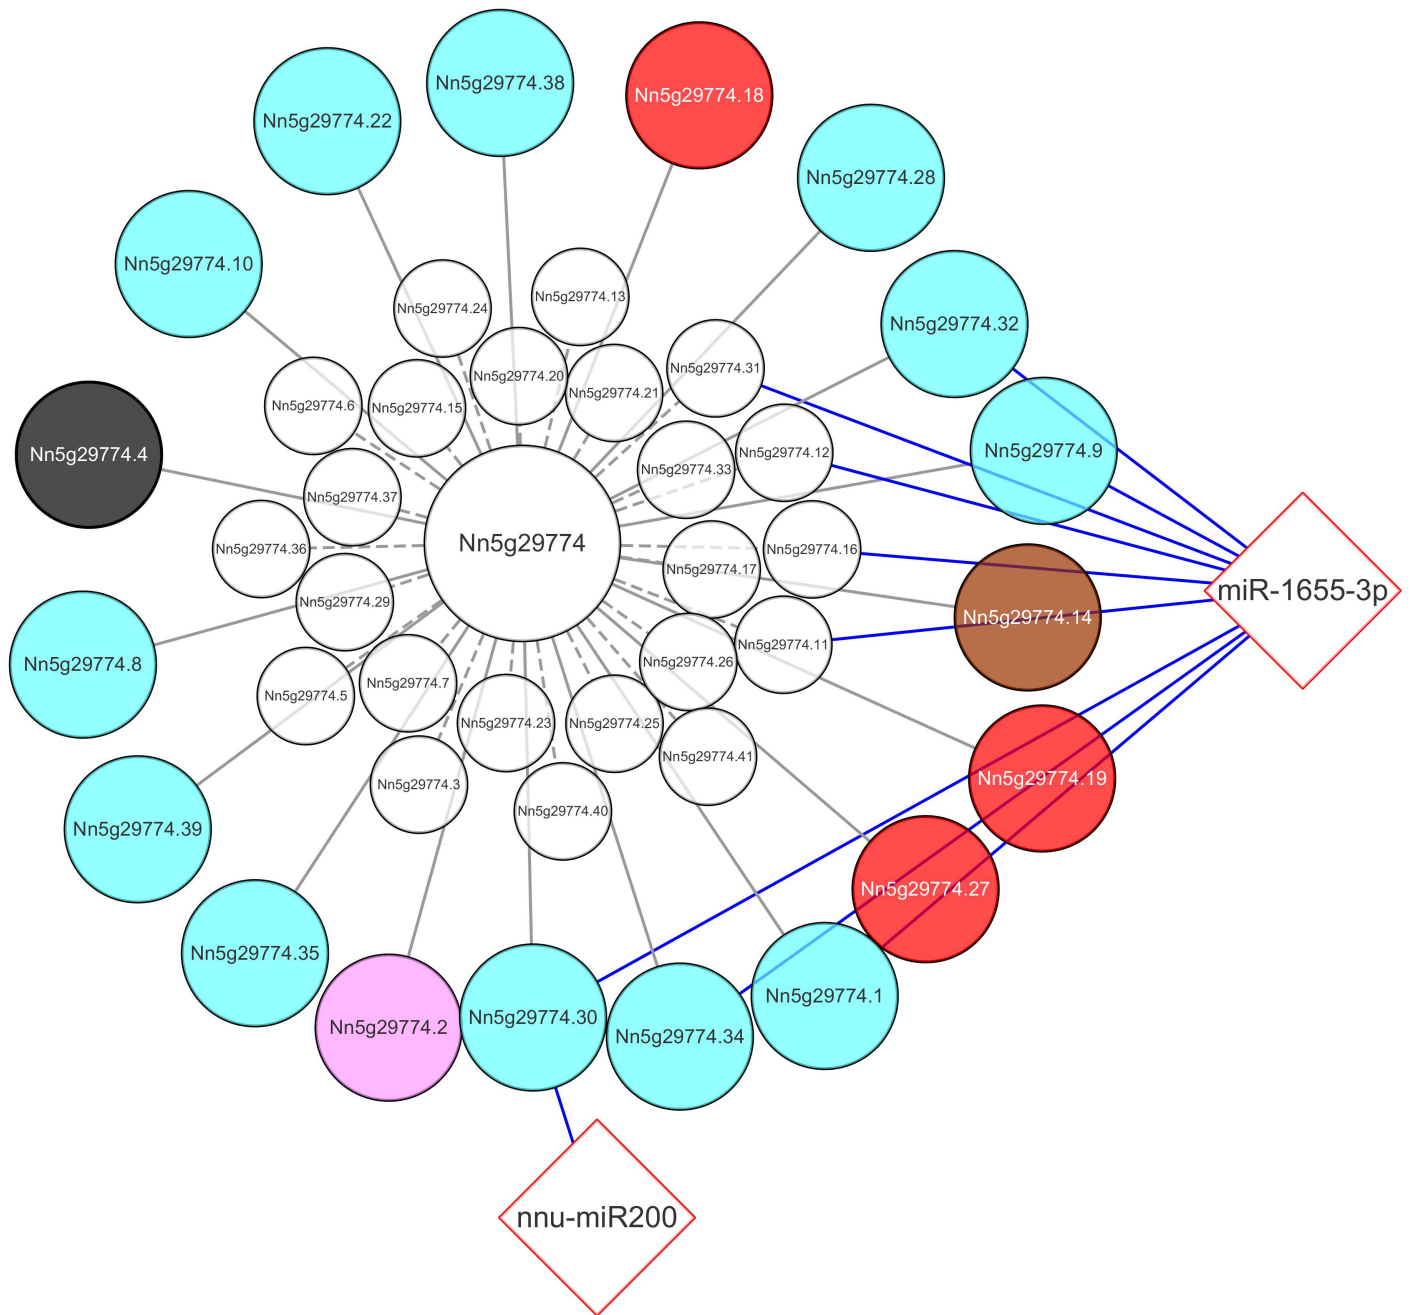

**Fig. S16** The homology analyses of filtered isoforms between lotus and rice/Arabidopsis. The inside track is the result of genes which had at least two isoforms mapped to the rice/Arabidopsis. The out track is the result of genes whose isoforms divided into different modules. Gene can be divided into three categories: different isoforms from the same lotus gene with their closest homologs being different genes in rice or Arabidopsis (I); different isoforms from the same lotus gene with their closest homologs being the same one isoform from one gene in rice or Arabidopsis (II); different isoforms from the same lotus gene with their closest homologs being different isoforms from one gene in rice or Arabidopsis (III)

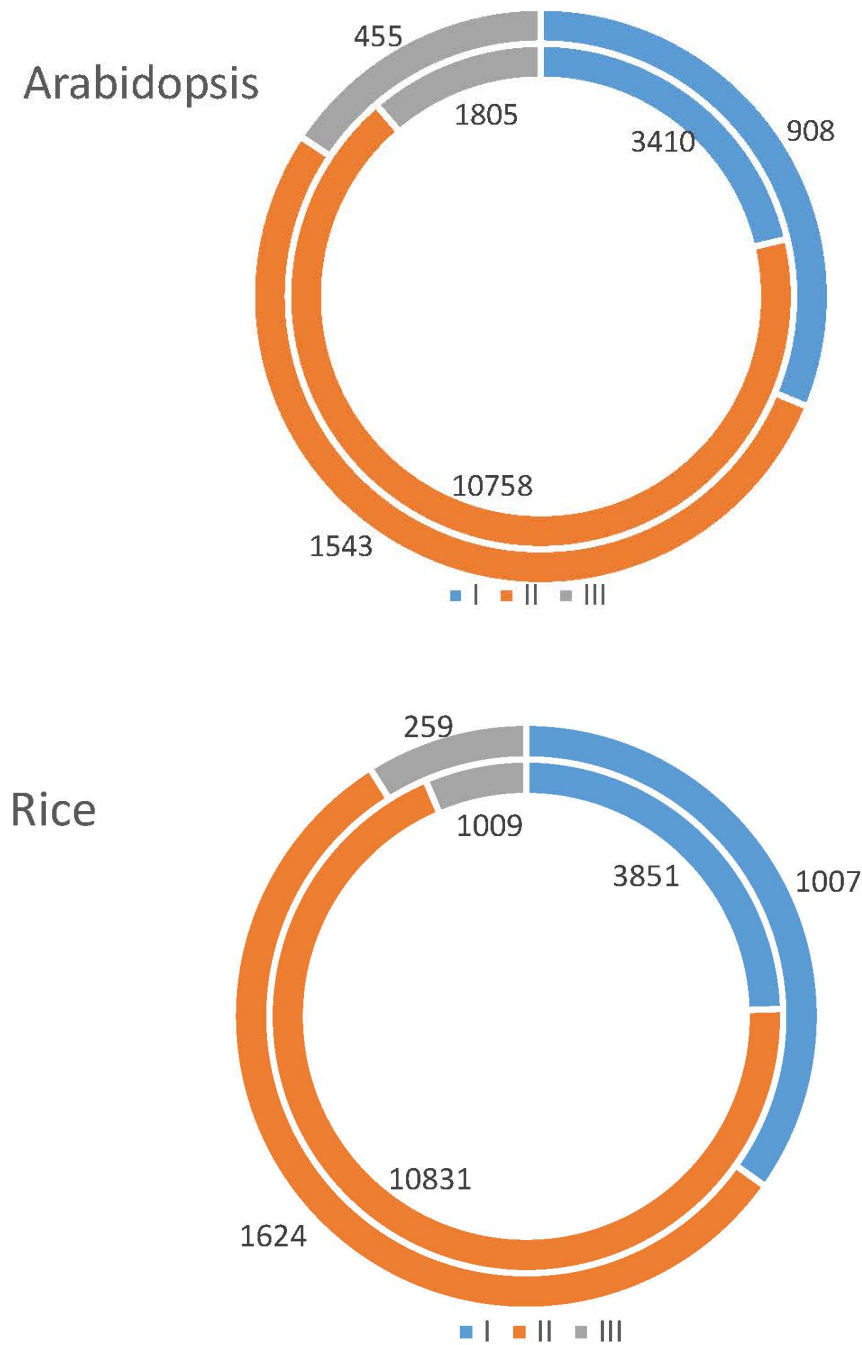

**Fig. S17** Plant hormone signal transduction pathway and related miRNAs

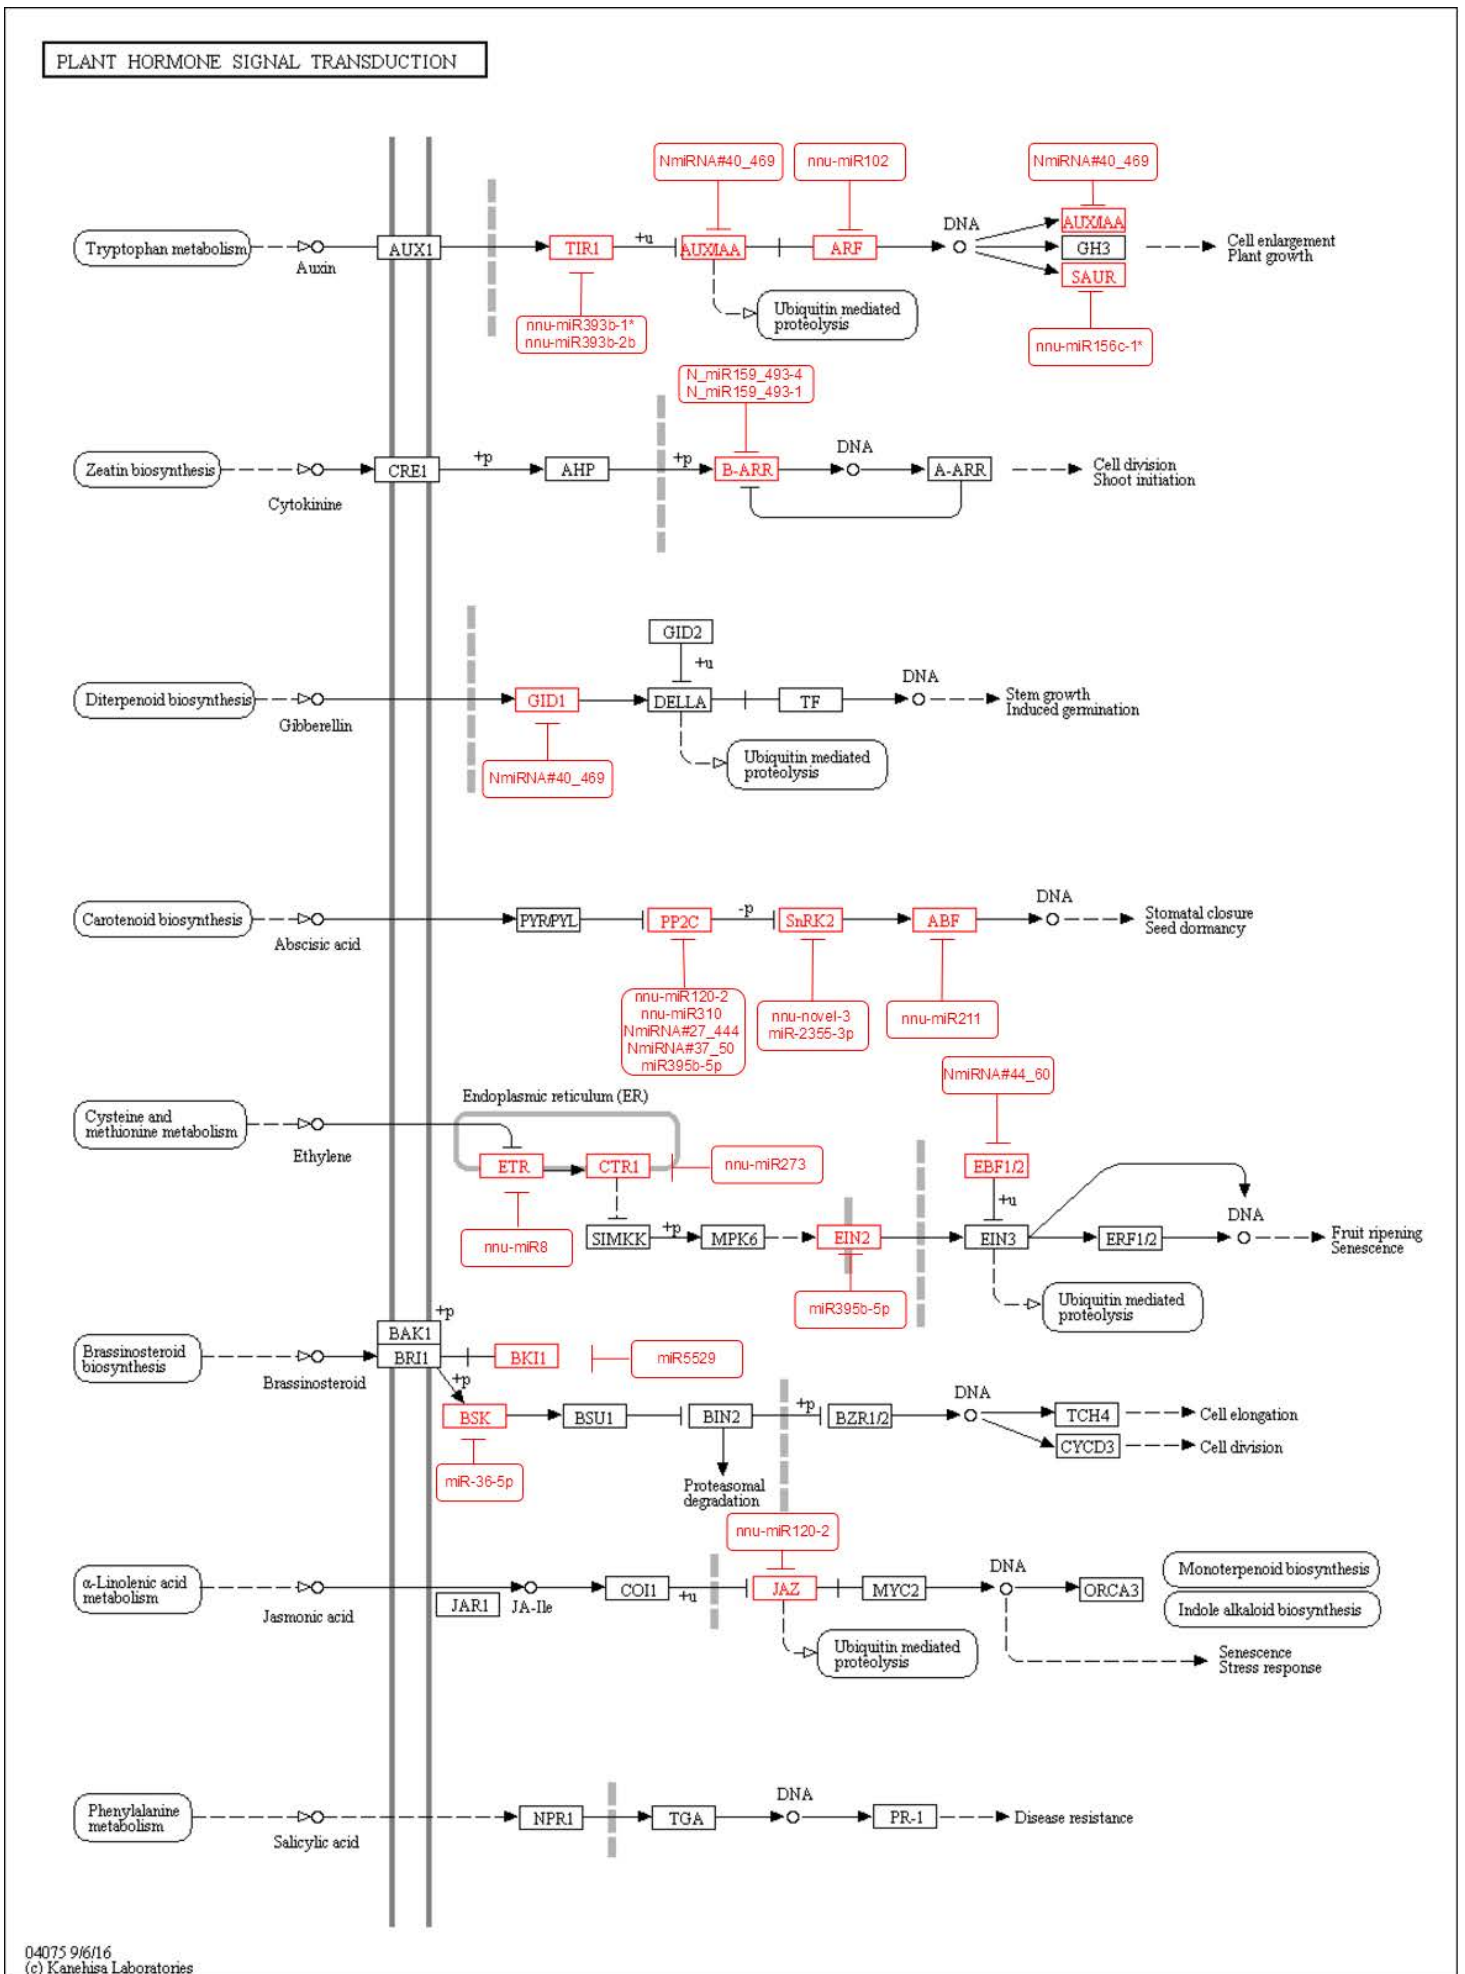

**Fig. S18 Plant hormone signal transduction pathway gene and its ortholog genes' isoforms**

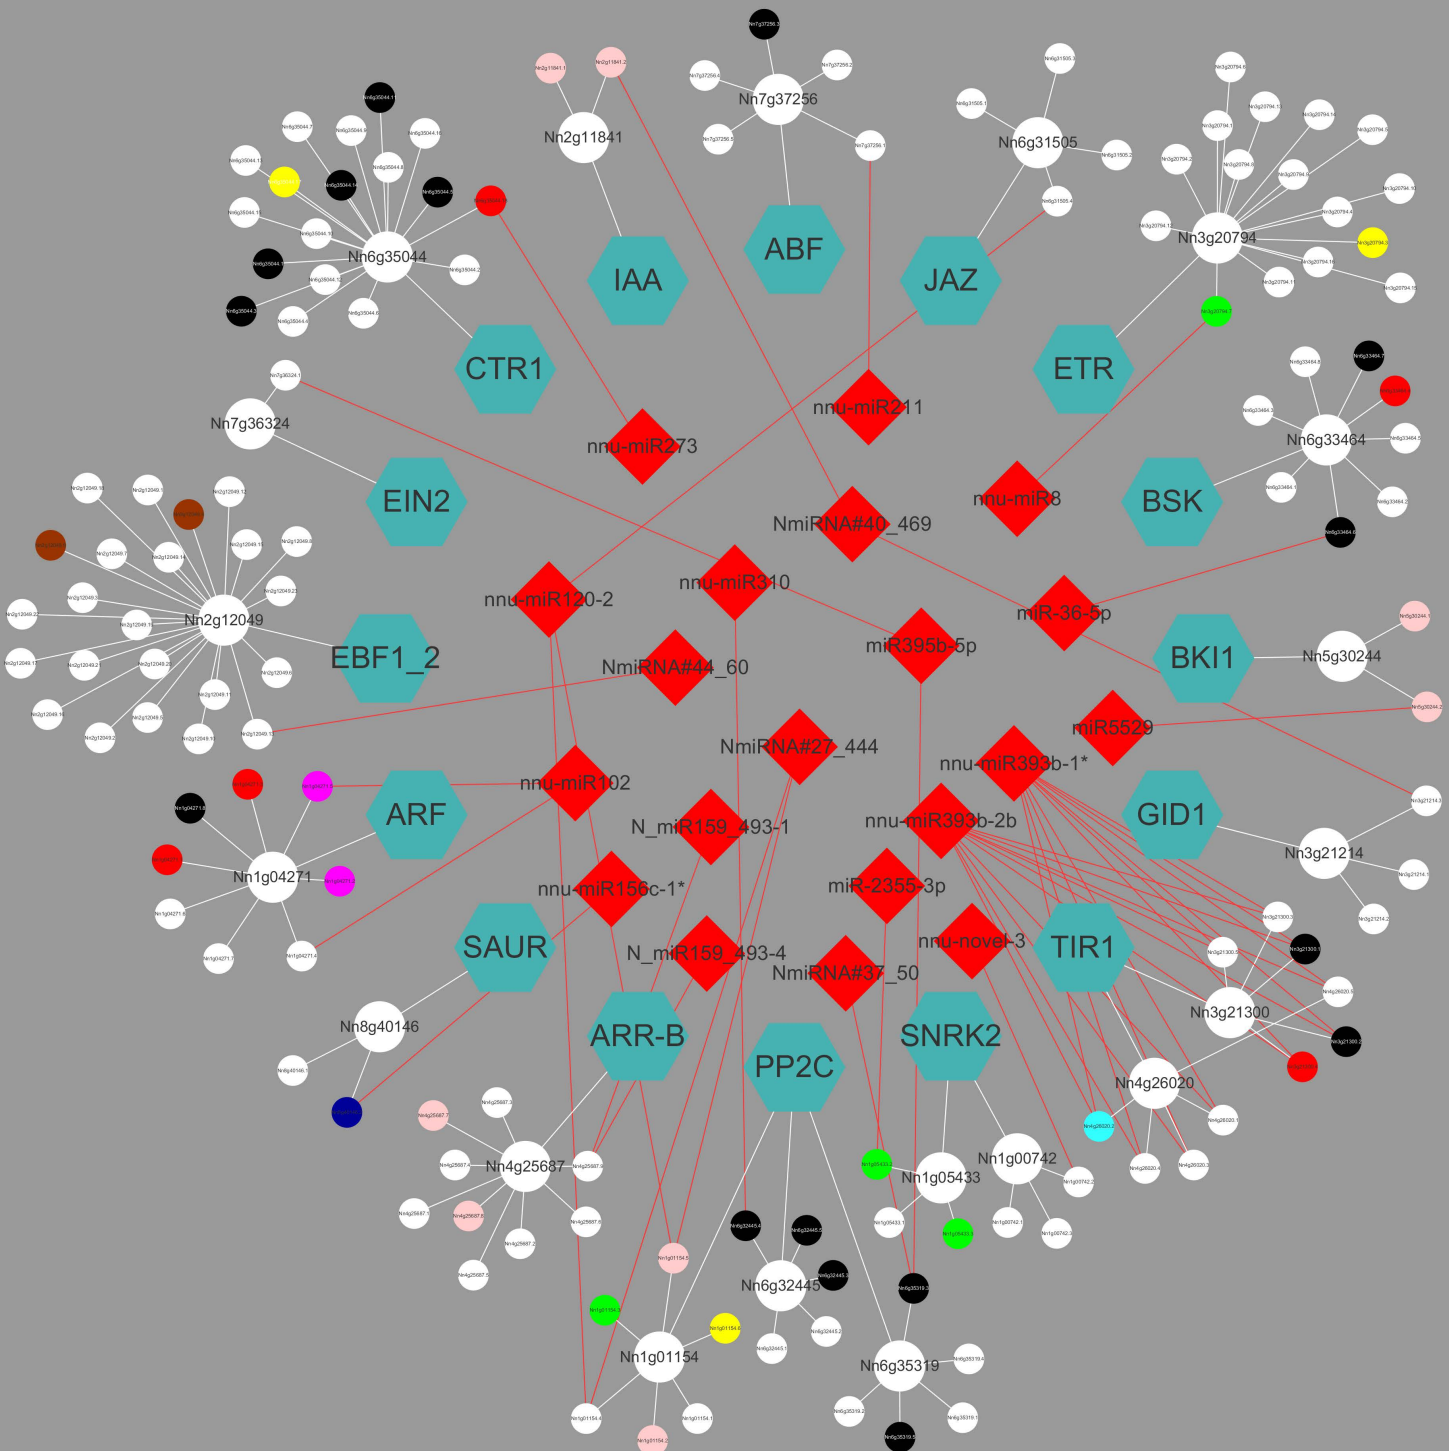

**Fig. S19** The expression analysis of abscisic acid-associated genes and related miRNAs expression.

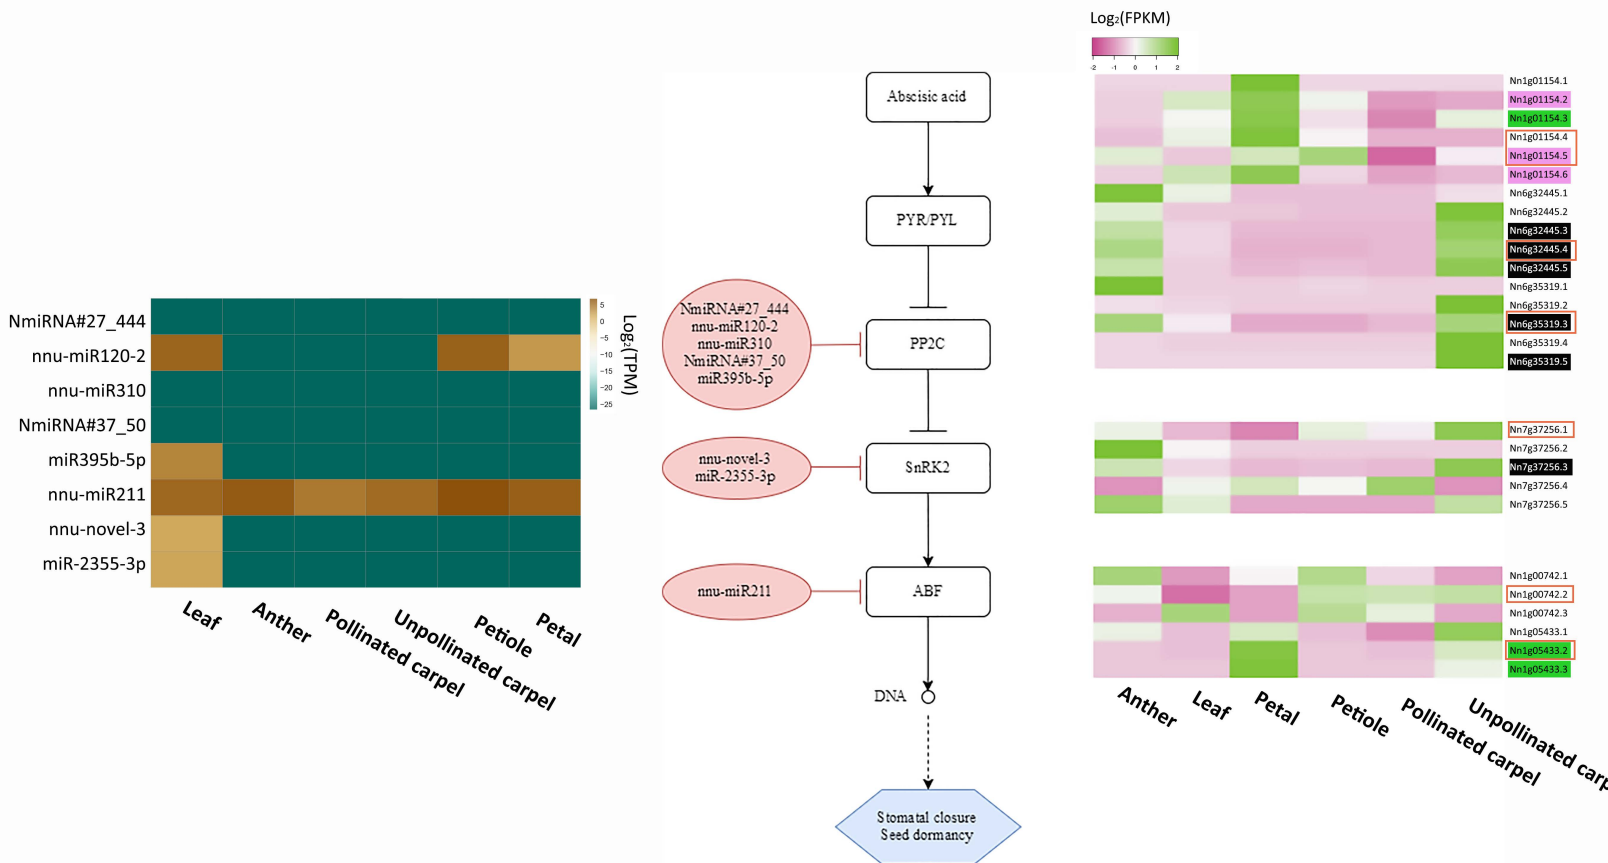

Supplement: 12864_2020_6853_MOESM1_ESM.pdf [file 12864_2020_6853_MOESM1_ESM.pdf]
